# Supplementary material for: Study on the Comprehensive Phytochemicals and the Anti-Ulcerative Colitis Effect of Saussurea pulchella
Source: MDPI journal article supplement (doi:10.3390/molecules28041526), 2023-02-04
Supplement: s1 [file s1]

## Supplementary method

### UPLC-Q/TOF-MS

A Waters Acquity UPLC system connected to a Waters Xevo G2-XS QTOF mass spectrometer (Waters Co., Milford, MA, USA) was used to perform chromatographic separations and mass spectrometry detections via electrospray ionization interface. An ACQUITY UPLC BEH C18 (100 mm × 2.1 mm, 1.7 μm) column with BEH C18 guard column (2.1 mm × 5 mm, 1.7 μm) provided by Waters Corporation was used to perform chromatographic separation. The total flow rate of the mobile phase solution was 0.4 ml·min<sup>-1</sup> with eluent A (H<sub>2</sub>O with 0.1% formic acid) and eluent B (acetonitrile with 0.1% formic acid). The low collision energy and high collision energy of the MS<sup>E</sup> mode were 6 V and 20~40 V, respectively. During data acquisition, the data collected by continuum mode. Sodium formate was used to calibrate the mass spectrometer within the scope of 100 to 1200 Da to ensure the mass accuracy and reproducibility. Leucine enkephalin (100 ng·ml<sup>-1</sup>, *m/z* 554.2615 in ESI-mode and 556.2771 in ESI+ mode) was used as the external reference of Lock Spray<sup>TM</sup>, which was injected at a continuous flow of 10 μL·min<sup>-1</sup>. The injected volume of samples was 5 μL for each run. The data were collected by a Masslynx<sup>TM</sup> V4.1 workstation (Waters, Manchester, UK). The temperatures of the autosampler and the column were set at 18 °C and 35 °C, respectively.

For phytochemical analysis, the gradient of qualitative analysis was consisted of 10% B from 0 min to 2 min, 10%→90% B from 2 min to 26 min, 90% B from 26 min to 28 min, back to 10% B from 28 min to 28.1 min, and hold 10% B from 28.1min to 40 min. While the elution procedure program for quantitative analysis was as follows: 10% B from 0 min to 1 min; 10%→90% B from 1 min to 12 min; 90% B from 12 min to 13 min; 90%→10% B in 13.1 min, and 10% B from 13.1 min to 20 min. The weak wash solvent was 10% (v/v) acetonitrile and the strong wash solvent was 90% (v/v) acetonitrile. The optimized MS parameters of both positive mode (ESI+) and negative mode (ESI-) were described as below: capillary voltage 2.2 kV or 2.5 kV; source temperature 150 °C; cone voltage 40 V; cone gas flow 50 L·h<sup>-1</sup>; desolvation temperature 400 °C; desolvation gas flow 800 L·h<sup>-1</sup>.

For metabolomic study, the gradient of elution procedure consisted of 0% B (0~2 min); 10%→90% B (2~26 min); 90% B (26~28 min); 90%→10% B (28~28.1 min); 10% B (28.1~40 min). The conditions for the MS system: capillary voltage in positive mode 2.5 kV and in negative mode of 2.3 kV, cone voltage 50 V, source temperature 180 °C, desolvation temperature 350 °C, desolventizing gas flow rate 700 L/h, cone gas flow rate 50 L/h, MSE mode, centroid, low energy 6 V, high energy 20~40 V. QC sample was run randomly four times throughout

the whole worklist. Raw data recording was performed on the MassLynx V4.1 workstation (Waters, Manchester, UK).

### *Qualitative analysis*

Firstly, an independent database was created in addition to the Traditional Medicine Library within the UNIFI platform. Namely, the chemical compositions reported from *Saussurea* species were searched in online databases, including China National Knowledge Infrastructure (CNKI), Web of Science, ChemSpider, Medline and PubMed, and were gathered to form the database including names, chemical structures, and molecular formulas of the components being acquired. Secondly, the MS raw data compressed by Waters Compression and Archival Tool v1.10, were imported into UNIFI software (Waters, Manchester, UK) and were automatically analyzed by the workflow, the main parameters for workflow were as follows: minimum peak area was 200; peak intensities of low and high energy were 200 and 1000 counts, respectively; the acceptable difference of retention time of reference substance was in the range of  $\pm 0.1$  min. Both positive adducts (+H and +Na) and negative adducts (-H and +COOH) were selected in the analysis. The components matched the evaluation criteria were screened quickly and were listed. Thirdly, the results were refined with a filter (mass error of the molecular weight or the typical fragments in the range of  $\pm 5$  ppm, response value  $> 5000$ ). Finally, following the above conditions, the compound was identified by comparing retention time and accurate molecular weight with reference substance or by comparing representative MS fragmentation patterns with the literatures.

### *Metabolomics*

#### *Preparation of test samples*

In order to make the serum sample free of protein, 150  $\mu\text{L}$  of serum were mixed with 600  $\mu\text{L}$  of pre-cooled methanol. Then, the mixture was kept standing for 10 min at room temperature. Supernatants collected by centrifugation (10,000 rpm, 10 min, 4°C) were lyophilized by vacuum freeze-dryer after being snap-frozen in liquid nitrogen. The dried residue dissolved in 100  $\mu\text{L}$  of methanol/water (4:1) was filtrated with a syringe filter (0.22  $\mu\text{m}$ ) to acquire the test sample solution, which could be injected into the UPLC system directly. Additionally, quality control (QC) sample for the method validation was prepared by gathering the same volume (10  $\mu\text{L}$ ) from each test sample solution.

According to the above the preparation of the serum test solution, the colon test solution and QC sample were prepared by using 0.1 g of colon tissue homogenized in 80% methanol (1000 mL).

### *Validation of LC-MS method*

Serum or colon QC sample and one serum or colon sample were used to verify the applied method. A total of 10 different mass ions (5 ions from ESI+ and from ESI- modes, respectively) were used to perform the validation test. And the relative standard deviations (RSDs) of peak intensity and retention time (RT, min) of these 10 ions were calculated. The investigation included: the stability of the system being monitored by using QC samples; the precision being evaluated by repeatedly measuring the QC samples for five consecutive times; the reproducibility of sample preparation being evaluated by testing five test solutions that prepared in parallel from the same serum or colon samples; the stability of the post-preparation sample was evaluated by detecting one serum sample or colon sample placed in autosampler for 0, 4, 8 and 12 h at 18 °C.

### *Analysis method*

MarkerLynx XS V4.1 (Waters, Milford, CT, USA) and Simca 15.0 software (Umetrics, Malmo, Sweden) were applied to perform the metabolomic analysis and to visualize the results of the study.

The raw data collected from MarkerLynx were processed by using parameters consisting of mass tolerance 0.10, retention time window 0.10, minimum intensity 20%, marker intensity threshold 5000 counts, and noise elimination level 7. The  $m/z$ -RT pairs with intensities for all screened peaks were displayed in Extend Statistics XS viewer. Then, the results were input into Simca software to carry out principal component analysis (PCA), orthogonal projections to latent structures discriminant analysis (OPLS-DA) and permutation test. The differential metabolites were screened by the variable importance for the projection (VIP) in the OPLS-DA results. Metabolites with  $FC > 2$  or  $< 0.5$ ,  $VIP > 1$  and  $p < 0.05$  in volcano map were considered statistically as potential biomarkers. Furthermore, the predictive receiver operating characteristic [1] curves were used to validate the above results, and the area under curve [2] of the ROC curve should be greater than 0.8. HMDB (<http://www.hmdb.ca/>) was used to identify the metabolites based on the exactly molecular weights and fragmentation patterns. The mass tolerance should be within  $\pm 10$  ppm. The MetaboAnalyst 4.0 database (<http://www.metaboanalyst.ca/>) was used to screen potential metabolisms with the impact-value threshold above 0.10.

## *Network pharmacology*

First, to acquire the compounds-related targets, the compounds characterized from SP by qualitative analysis were uploaded to some database, such as the ECTM database (<http://www.nrc.ac.cn:9090/ETCM/>), TargetNet database (<http://targetnet.scbdd.com>), SEA database (<http://sea.bkslab.org>), SwissTargetPrediction database (<http://swisstargetprediction.ch/>), Symmap database (<https://www.bioinfo.org/symmap>), Batman-TCM database (<http://bionet.ncpsb.org/batman-tcm/>).

Second, with the keywords of "ulcerative colitis", disease-related targets were collected from the following databases: Genecards (<https://www.genecards.org/>), DisGeNET (<https://www.disgenet.org/>) and Malacard (<https://www.malacards.org/>). After merging all the targets and removing duplication, the core targets of compounds and diseases were derived by using the STRING database (<https://cn.string-db.org/>).

Third, the networks of "compounds in SP-core targets" were constructed by classifying all core targets (enzymes, transporters, receptors, cytokines, proteins, and others). The network was finally generated by topological analysis with Cytoscape software (3.7.1) (<http://www.cytoscape.org/>), and the active compounds were screened out by average degrees. All the core targets were considered as the potential therapeutic targets.

**Table S1.** Compounds identified from SP by UPLC-Q/TOF-MS

| NO.             | $t_R$<br>(min) | Formula                                                       | Theoretical<br>Mass (Da) | Calculated<br>Mass (Da) | Mass<br>error<br>(ppm) | MS <sup>E</sup> Fragmentation                                                                                                                                                                                                                                                                                                                                                                           | Identification                      | Ref.   |
|-----------------|----------------|---------------------------------------------------------------|--------------------------|-------------------------|------------------------|---------------------------------------------------------------------------------------------------------------------------------------------------------------------------------------------------------------------------------------------------------------------------------------------------------------------------------------------------------------------------------------------------------|-------------------------------------|--------|
| 1 <sup>*</sup>  | 0.71           | C <sub>7</sub> H <sub>12</sub> O <sub>6</sub>                 | 192.0634                 | 192.0643                | 4.69                   | 191.0570[M-H] <sup>-</sup> , 173.0443[M-H-H <sub>2</sub> O] <sup>-</sup>                                                                                                                                                                                                                                                                                                                                | Quinic acid                         | S      |
| 2 <sup>*</sup>  | 0.79           | C <sub>16</sub> H <sub>18</sub> O <sub>9</sub>                | 354.0951                 | 354.0961                | 2.82                   | 353.0988[M-H] <sup>-</sup> , 191.0569[M-H-C <sub>8</sub> H <sub>6</sub> O <sub>3</sub> ] <sup>-</sup> ,<br>179.0338[M-H-C <sub>7</sub> H <sub>10</sub> O <sub>5</sub> ] <sup>-</sup> , 135.0451[M-H-C <sub>8</sub> H <sub>10</sub> O <sub>7</sub> ] <sup>-</sup>                                                                                                                                        | Chlorogenic acid                    | S      |
| 3 <sup>*</sup>  | 0.82           | C <sub>6</sub> H <sub>12</sub> O <sub>6</sub>                 | 180.0634                 | 180.0637                | 1.67                   | 179.0564[M-H] <sup>-</sup> , 131.0358[M-H-H <sub>2</sub> O-CH <sub>2</sub> O] <sup>-</sup> , 103.0404[M-H-H <sub>2</sub> O-C <sub>2</sub> H <sub>5</sub> O <sub>2</sub> ] <sup>-</sup>                                                                                                                                                                                                                  | D-Galactose                         | [3]    |
| 4 <sup>*</sup>  | 0.83           | C <sub>30</sub> H <sub>38</sub> O <sub>15</sub>               | 638.2211                 | 638.2232                | 3.29                   | 683.2214[M-H] <sup>-</sup> , 489.1377[M-H-Fuc] <sup>-</sup> ,<br>458.1828[M-H-C <sub>9</sub> H <sub>7</sub> O <sub>4</sub> ] <sup>-</sup> , 161.0201[M-H-Glu-Fuc-C <sub>8</sub> H <sub>11</sub> O <sub>2</sub> ] <sup>-</sup>                                                                                                                                                                           | Sucrose                             | [4,5]  |
| 5 <sup>*</sup>  | 0.83           | C <sub>12</sub> H <sub>22</sub> O <sub>11</sub>               | 342.1162                 | 342.1179                | 4.97                   | 341.1106[M-H] <sup>-</sup> , 179.0571[M-H-Glu] <sup>-</sup> ,<br>161.0465[M-H-OFru] <sup>-</sup>                                                                                                                                                                                                                                                                                                        | Cistanoside C                       | [4]    |
| 6 <sup>*</sup>  | 0.94           | C <sub>10</sub> H <sub>17</sub> NO <sub>3</sub>               | 199.1208                 | 199.1213                | 2.51                   | 200.1286[M+H] <sup>+</sup> , 168.1017[M+H-CH <sub>3</sub> O] <sup>+</sup> ,<br>126.0930[M+H-C <sub>2</sub> H <sub>4</sub> -H <sub>2</sub> O-CH <sub>3</sub> O] <sup>+</sup> ,<br>122.0978[M+H-H <sub>2</sub> O-C <sub>2</sub> H <sub>5</sub> O <sub>2</sub> ] <sup>+</sup> ,<br>94.0687[M+H-C <sub>2</sub> H <sub>4</sub> -H <sub>2</sub> O-C <sub>2</sub> H <sub>5</sub> O <sub>2</sub> ] <sup>+</sup> | Tussilagine                         | [1]    |
| 7 <sup>*</sup>  | 0.96           | C <sub>14</sub> H <sub>18</sub> O <sub>9</sub>                | 330.0951                 | 330.0961                | 3.03                   | 329.0889[M-H] <sup>-</sup> , 167.0356[M-H-Glu] <sup>-</sup>                                                                                                                                                                                                                                                                                                                                             | Mudanoside A                        | [6]    |
| 8 <sup>*</sup>  | 0.98           | C <sub>13</sub> H <sub>16</sub> O <sub>10</sub>               | 332.0743                 | 332.0754                | 3.31                   | 331.0681[M-H] <sup>-</sup> , 168.0068[M-H-Glu] <sup>-</sup> ,<br>124.0173[M-H-Glu-CO <sub>2</sub> ] <sup>-</sup>                                                                                                                                                                                                                                                                                        | Glucogallin                         | [7]    |
| 9 <sup>*</sup>  | 1.01           | C <sub>7</sub> H <sub>6</sub> O <sub>4</sub>                  | 154.0266                 | 154.0264                | -1.30                  | 153.0192[M-H] <sup>-</sup> , 109.0281[M-H-HCOOH] <sup>-</sup>                                                                                                                                                                                                                                                                                                                                           | Protocatechuic acid                 | S      |
| 10 <sup>*</sup> | 1.03           | C <sub>11</sub> H <sub>12</sub> O <sub>6</sub>                | 240.0634                 | 240.0643                | 3.75                   | 285.0625[M+HCOO] <sup>-</sup> , 239.0564[M-H] <sup>-</sup> ,<br>149.0597[M-H-2HCOOH] <sup>-</sup> , 108.0518[M-H-C <sub>4</sub> H <sub>5</sub> O <sub>5</sub> ] <sup>-</sup>                                                                                                                                                                                                                            | Eucomic acid                        | [8]    |
| 11 <sup>*</sup> | 1.08           | C <sub>15</sub> H <sub>21</sub> NO <sub>7</sub>               | 327.1318                 | 327.1323                | 1.53                   | 328.1395[M+H] <sup>+</sup> , 310.1288[M+H-H <sub>2</sub> O] <sup>+</sup> ,<br>292.1183[M+H-2H <sub>2</sub> O] <sup>+</sup> , 264.1229[M+H-H <sub>2</sub> O-HCOO] <sup>+</sup> , 166.0867[M+H-C <sub>6</sub> H <sub>10</sub> O <sub>5</sub> ] <sup>+</sup>                                                                                                                                               | Fructose-phenylalanine              | [9]    |
| 12 <sup>*</sup> | 1.13           | C <sub>14</sub> H <sub>20</sub> O <sub>9</sub>                | 332.1107                 | 332.1121                | 4.22                   | 331.1049[M-H] <sup>-</sup> , 168.0431[M-H-Glu] <sup>-</sup> ,<br>154.0237[M-H-Glu-CH <sub>3</sub> ] <sup>-</sup> , 139.0028[M-H-Glu-2CH <sub>3</sub> ] <sup>-</sup> , 137.0246[M-H-Glu-CH <sub>3</sub> O] <sup>-</sup>                                                                                                                                                                                  | Leonuriside A                       | [10]   |
| 13 <sup>*</sup> | 1.16           | C <sub>16</sub> H <sub>18</sub> O <sub>9</sub>                | 354.0951                 | 354.0964                | 3.75                   | 353.0887[M-H] <sup>-</sup> , 191.0568[M-H-C <sub>8</sub> H <sub>6</sub> O <sub>3</sub> ] <sup>-</sup> ,<br>135.0456[M-H-C <sub>8</sub> H <sub>10</sub> O <sub>7</sub> ] <sup>-</sup>                                                                                                                                                                                                                    | Neochlorogenic acid                 | S      |
| 14 <sup>*</sup> | 1.20           | C <sub>15</sub> H <sub>18</sub> O <sub>9</sub>                | 342.0951                 | 342.0965                | 4.09                   | 341.0892[M-H] <sup>-</sup> , 179.0342[M-H-Glu] <sup>-</sup> ,<br>135.0446[M-H-Glu-CO <sub>2</sub> ] <sup>-</sup>                                                                                                                                                                                                                                                                                        | Phoeniceoside                       | [11]   |
| 15 <sup>*</sup> | 1.24           | C <sub>15</sub> H <sub>18</sub> O <sub>8</sub>                | 326.1002                 | 326.1011                | 2.76                   | 325.0938[M-H] <sup>-</sup> , 163.0413[M-H-Glu] <sup>-</sup> ,<br>119.0513[M-H-Glu-HCOOH] <sup>-</sup>                                                                                                                                                                                                                                                                                                   | Melilotoside                        | [12]   |
| 16 <sup>*</sup> | 1.30           | C <sub>18</sub> H <sub>18</sub> O <sub>5</sub>                | 314.1154                 | 314.1162                | 3.18                   | 315.1235[M+H] <sup>+</sup> , 193.0875[M+H-C <sub>7</sub> H <sub>6</sub> O <sub>2</sub> ] <sup>+</sup> ,<br>147.0451[M+H-CH <sub>3</sub> O-C <sub>8</sub> H <sub>6</sub> O <sub>2</sub> ] <sup>+</sup> ,<br>137.0622[M+H-C <sub>10</sub> H <sub>10</sub> O <sub>3</sub> ] <sup>+</sup>                                                                                                                   | <i>p</i> -Hydroxyphenethyl ferulate | CFM-ID |
| 17 <sup>*</sup> | 1.31           | C <sub>7</sub> H <sub>6</sub> O <sub>4</sub>                  | 154.0266                 | 154.0270                | 2.60                   | 153.0197[M-H] <sup>-</sup> , 109.0293[M-H-HCOOH] <sup>-</sup>                                                                                                                                                                                                                                                                                                                                           | 3,4-Dihydroxybenzoic acid           | [13]   |
| 18 <sup>*</sup> | 1.45           | C <sub>9</sub> H <sub>7</sub> NO                              | 145.0528                 | 145.0523                | -3.45                  | 146.0595[M+H] <sup>+</sup> , 118.0655[M+H-CHO] <sup>+</sup>                                                                                                                                                                                                                                                                                                                                             | Indole-3-aldehyde                   | [14]   |
| 19 <sup>*</sup> | 1.47           | C <sub>27</sub> H <sub>28</sub> N <sub>2</sub> O <sub>4</sub> | 444.2049                 | 444.2035                | -3.16                  | 443.1962[M-H] <sup>-</sup> , 252.1025[M-H-C <sub>11</sub> H <sub>13</sub> O <sub>2</sub> N] <sup>-</sup>                                                                                                                                                                                                                                                                                                | Cryptochlorogenic acid              | S      |
| 20 <sup>*</sup> | 1.47           | C <sub>16</sub> H <sub>18</sub> O <sub>9</sub>                | 354.0951                 | 354.0962                | 3.11                   | 353.0889[M-H] <sup>-</sup> , 307.0824[M-H-HCOOH] <sup>-</sup> , 191.0566[M-H-C <sub>8</sub> H <sub>6</sub> O <sub>3</sub> ] <sup>-</sup> ,<br>146.0587[M-H-C <sub>9</sub> H <sub>6</sub> O <sub>3</sub> -HCOOH] <sup>-</sup>                                                                                                                                                                            | Aurantiamide acetate                | [15]   |
| 21 <sup>*</sup> | 1.67           | C <sub>10</sub> H <sub>12</sub> O <sub>4</sub>                | 196.0736                 | 196.0742                | 3.06                   | 241.0724[M+HCOO] <sup>-</sup> , 195.0661[M-H] <sup>-</sup> ,<br>179.0721[M-H-H <sub>2</sub> O] <sup>-</sup> , 165.0563[M-H-CH <sub>3</sub> O] <sup>-</sup>                                                                                                                                                                                                                                              | Acetosyringone                      | [16]   |
| 22 <sup>*</sup> | 1.76           | C <sub>18</sub> H <sub>26</sub> O <sub>9</sub>                | 386.1577                 | 386.1590                | 3.37                   | 431.1572[M+HCOO] <sup>-</sup> , 385.1503[M-H] <sup>-</sup> ,<br>223.0995[M-H-Glu] <sup>-</sup> , 135.0467[M-H-OGlu-C <sub>4</sub> H <sub>7</sub> O] <sup>-</sup>                                                                                                                                                                                                                                        | Methylsyringin                      | [17]   |
| 23              | 1.78           | C <sub>19</sub> H <sub>27</sub> NO <sub>6</sub>               | 365.1838                 | 365.1844                | 1.62                   | 366.1917[M+H] <sup>+</sup> , 330.1704[M+H-2H <sub>2</sub> O] <sup>+</sup> ,<br>262.1437[M+H-H <sub>2</sub> O-C <sub>4</sub> H <sub>7</sub> O <sub>2</sub> ] <sup>+</sup>                                                                                                                                                                                                                                | Pulchellamine B                     | [18]   |

|     |      |                                                 |          |          |       |                                                                                                                                                                                                                                                                                                                                                                                                    |                                                                             |        |
|-----|------|-------------------------------------------------|----------|----------|-------|----------------------------------------------------------------------------------------------------------------------------------------------------------------------------------------------------------------------------------------------------------------------------------------------------------------------------------------------------------------------------------------------------|-----------------------------------------------------------------------------|--------|
| 24* | 1.82 | C <sub>14</sub> H <sub>18</sub> O <sub>7</sub>  | 298.1053 | 298.1067 | 4.70  | 343.1039[M+HCOO] <sup>-</sup> , 164.0695[M-H-C <sub>8</sub> H <sub>7</sub> O <sub>2</sub> ] <sup>-</sup> , 133.0303[M-H-Glu] <sup>-</sup> , 121.0300[M-H-Glu-CH <sub>3</sub> ] <sup>-</sup>                                                                                                                                                                                                        | Amelarioside                                                                | [19]   |
| 25* | 1.88 | C <sub>20</sub> H <sub>27</sub> NO <sub>6</sub> | 377.1838 | 377.1846 | 2.12  | 378.1919[M+H] <sup>+</sup> , 360.1802[M+H-H <sub>2</sub> O] <sup>+</sup> , 332.1862[M+H-HCOOH] <sup>+</sup> , 314.1749[M+H-HCOOH-H <sub>2</sub> O] <sup>+</sup> , 227.1060[M+H-2H <sub>2</sub> O-C <sub>5</sub> H <sub>9</sub> NO <sub>2</sub> ] <sup>+</sup>                                                                                                                                      | Calophyllamine A                                                            | [20]   |
| 26  | 1.97 | C <sub>17</sub> H <sub>24</sub> O <sub>9</sub>  | 372.1420 | 372.1433 | 3.49  | 417.1445[M+HCOO] <sup>-</sup> , 371.1351[M-H] <sup>-</sup> , 209.0821[M-H-Glu] <sup>-</sup> , 194.0586[M-H-CH <sub>3</sub> -Glu] <sup>-</sup> , 151.0409[M-H-Glu-C <sub>3</sub> H <sub>5</sub> O] <sup>-</sup>                                                                                                                                                                                     | Syringin                                                                    | [7]    |
| 27* | 2.08 | C <sub>20</sub> H <sub>20</sub> O <sub>8</sub>  | 388.1158 | 388.1156 | -0.51 | 411.1048 [M+Na] <sup>+</sup> , 389.1232[M+H] <sup>+</sup> , 371.1133[M+H-H <sub>2</sub> O] <sup>+</sup> , 167.0720[M+H-C <sub>11</sub> H <sub>10</sub> O <sub>5</sub> ] <sup>+</sup>                                                                                                                                                                                                               | 6 $\alpha$ -Catechyl-2 $\alpha$ -guaicyl-3,7-dioxabicyclo[3.3.0]octan-4-one | [21]   |
| 28* | 2.26 | C <sub>7</sub> H <sub>6</sub> O <sub>3</sub>    | 138.0317 | 138.0323 | 4.35  | 137.0251[M-H] <sup>-</sup> , 109.0302[M-H-CHO] <sup>-</sup>                                                                                                                                                                                                                                                                                                                                        | Protocatechuic aldehyde                                                     | s      |
| 29* | 2.36 | C <sub>15</sub> H <sub>20</sub> O <sub>8</sub>  | 328.1158 | 328.1168 | 3.05  | 327.1095[M-H] <sup>-</sup> , 165.0562[M-H-Glu] <sup>-</sup> , 147.0453[M-H-H <sub>2</sub> O-Glu] <sup>-</sup>                                                                                                                                                                                                                                                                                      | Paeonoside                                                                  | [22]   |
| 30* | 2.48 | C <sub>17</sub> H <sub>24</sub> O <sub>10</sub> | 388.1369 | 388.1387 | 4.61  | 387.1305[M-H] <sup>-</sup> , 371.0989[M-H-CH <sub>3</sub> ] <sup>-</sup> , 207.0664[M-H-OGlu] <sup>-</sup> , 192.0432[M-H-Glu-CH <sub>3</sub> O] <sup>-</sup>                                                                                                                                                                                                                                      | Geniposide                                                                  | [23]   |
| 31* | 2.57 | C <sub>16</sub> H <sub>18</sub> O <sub>8</sub>  | 338.1002 | 338.1010 | 2.37  | 337.0931[M-H] <sup>-</sup> , 191.0562[M-H-C <sub>8</sub> H <sub>7</sub> O <sub>2</sub> ] <sup>-</sup> , 163.0402[M-H-C <sub>7</sub> H <sub>11</sub> O <sub>5</sub> ] <sup>-</sup>                                                                                                                                                                                                                  | 3- <i>p</i> -Coumaroylquinic acid                                           | [24]   |
| 32* | 2.61 | C <sub>8</sub> H <sub>8</sub> O <sub>4</sub>    | 168.0423 | 168.0426 | 1.79  | 167.0373[M-H] <sup>-</sup> , 123.0355[M-H-HCOOH] <sup>-</sup> , 108.0216[M-H-HCOOH-CH <sub>3</sub> ] <sup>-</sup> , 93.0343[M-H-HCOOH-CH <sub>3</sub> O] <sup>-</sup>                                                                                                                                                                                                                              | Vanillic acid                                                               | [25]   |
| 33* | 2.77 | C <sub>9</sub> H <sub>10</sub> O <sub>5</sub>   | 198.0528 | 198.0551 | 1.51  | 197.0449[M-H] <sup>-</sup> , 179.0345[M-H-H <sub>2</sub> O] <sup>-</sup> , 135.0444[M-H-H <sub>2</sub> O-HCOOH] <sup>-</sup>                                                                                                                                                                                                                                                                       | Syringic acid                                                               | [26]   |
| 34* | 2.80 | C <sub>17</sub> H <sub>26</sub> O <sub>7</sub>  | 342.1679 | 342.1692 | 3.80  | 387.1664[M+HCOO] <sup>-</sup> , 341.1608[M-H] <sup>-</sup> , 163.1127[M-H-OGlu] <sup>-</sup>                                                                                                                                                                                                                                                                                                       | Jasmolone glucoside                                                         | CFM-ID |
| 35* | 2.81 | C <sub>9</sub> H <sub>8</sub> O <sub>4</sub>    | 180.0423 | 180.0422 | -0.56 | 179.0340[M-H] <sup>-</sup> , 135.0438[M-H-HCOOH] <sup>-</sup>                                                                                                                                                                                                                                                                                                                                      | Caffeic acid                                                                | s      |
| 36* | 2.82 | C <sub>20</sub> H <sub>27</sub> NO <sub>6</sub> | 377.1838 | 377.1831 | -1.92 | 378.1904[M+H] <sup>+</sup> , 332.1854[M+H-HCOOH] <sup>+</sup> , 257.1408[M+H-2H <sub>2</sub> O-CH <sub>2</sub> -C <sub>3</sub> H <sub>5</sub> O <sub>2</sub> ] <sup>+</sup> , 235.0971[M+H-C <sub>3</sub> H <sub>5</sub> O <sub>2</sub> -C <sub>4</sub> H <sub>8</sub> N] <sup>+</sup> , 206.0939[M+H-C <sub>3</sub> H <sub>5</sub> O <sub>2</sub> -C <sub>5</sub> H <sub>8</sub> NO] <sup>+</sup> | Lanicepomine A                                                              | [18]   |
| 37* | 2.98 | C <sub>13</sub> H <sub>18</sub> O <sub>6</sub>  | 270.1103 | 270.1111 | 2.96  | 315.1113[M+HCOO] <sup>-</sup> , 269.1029[M-H] <sup>-</sup> , 161.0455[M-H-C <sub>7</sub> H <sub>8</sub> O] <sup>-</sup>                                                                                                                                                                                                                                                                            | Benzyl $\beta$ -D-glucoside                                                 | [27]   |
| 38* | 3.06 | C <sub>15</sub> H <sub>16</sub> O <sub>6</sub>  | 292.0947 | 292.0958 | 3.77  | 337.0930[M+HCOO] <sup>-</sup> , 291.0873[M-H] <sup>-</sup> , 163.0414[M-H-H <sub>2</sub> O-C <sub>2</sub> HO-C <sub>4</sub> H <sub>5</sub> O] <sup>-</sup>                                                                                                                                                                                                                                         | Cnidimol D                                                                  | [28]   |
| 39* | 3.50 | C <sub>11</sub> H <sub>14</sub> O <sub>5</sub>  | 226.0841 | 226.0844 | 1.34  | 225.0770[M-H] <sup>-</sup> , 195.0663[M-H-CH <sub>3</sub> O] <sup>-</sup> , 180.0427[M-H-C <sub>2</sub> H <sub>5</sub> O] <sup>-</sup> , 149.0240[M-H-CH <sub>3</sub> O-C <sub>2</sub> H <sub>5</sub> O] <sup>-</sup>                                                                                                                                                                              | 3-Hydroxy-1-(4-hydroxy-3,5-dimethoxyphenyl)propan-1-one                     | [29]   |
| 40* | 3.52 | C <sub>26</sub> H <sub>34</sub> O <sub>12</sub> | 538.2050 | 538.2058 | 1.49  | 583.2031[M+HCOO] <sup>-</sup> , 537.1982[M-H] <sup>-</sup> , 375.1454[M-H-Glu] <sup>-</sup> , 357.1342[M-H-Glu-H <sub>2</sub> O] <sup>-</sup> , 151.0407[M-H-Glu-C <sub>12</sub> H <sub>16</sub> O <sub>4</sub> ] <sup>-</sup>                                                                                                                                                                     | Medusaside A                                                                | [30]   |
| 41* | 3.58 | C <sub>17</sub> H <sub>20</sub> O <sub>9</sub>  | 368.1107 | 368.1110 | 0.81  | 367.1037[M-H] <sup>-</sup> , 191.0564[M-H-CH <sub>3</sub> -C <sub>8</sub> H <sub>5</sub> O <sub>3</sub> ] <sup>-</sup> , 161.0241[M-H-C <sub>8</sub> H <sub>14</sub> O <sub>6</sub> ] <sup>-</sup> , 135.0450[M-H-C <sub>9</sub> H <sub>12</sub> O <sub>7</sub> ] <sup>-</sup>                                                                                                                     | Methyl 3-caffeoylquinic acid                                                | [31]   |
| 42* | 3.70 | C <sub>19</sub> H <sub>32</sub> O <sub>8</sub>  | 388.2097 | 388.2116 | 4.89  | 433.2099[M+HCOO] <sup>-</sup> , 387.2030[M-H] <sup>-</sup> , 225.1501[M-H-Glu] <sup>-</sup> , 153.0920[M-H-C <sub>4</sub> H <sub>7</sub> O-Glu] <sup>-</sup>                                                                                                                                                                                                                                       | Icariside B8                                                                | CFM-ID |
| 43* | 3.72 | C <sub>26</sub> H <sub>34</sub> O <sub>12</sub> | 538.2050 | 538.2068 | 3.34  | 583.2039[M+HCOO] <sup>-</sup> , 537.1980[M-H] <sup>-</sup> , 375.1451[M-H-Glu] <sup>-</sup> , 153.0927[M-H-C <sub>17</sub> H <sub>20</sub> O <sub>10</sub> ] <sup>-</sup>                                                                                                                                                                                                                          | Medusaside B                                                                | [30]   |
| 44* | 3.73 | C <sub>19</sub> H <sub>30</sub> O <sub>8</sub>  | 386.1941 | 386.1949 | 2.07  | 431.1961 [M+HCOO] <sup>-</sup> , 385.1970[M-H] <sup>-</sup> , 223.1344[M-H-Glu] <sup>-</sup> , 205.1231[M-H-Glu-H <sub>2</sub> O] <sup>-</sup>                                                                                                                                                                                                                                                     | Saussureoside B                                                             | [32]   |

|                 |      |                                                 |          |          |       |                                                                                                                                                                                                                                                                                                                                                                    |                                                 |        |
|-----------------|------|-------------------------------------------------|----------|----------|-------|--------------------------------------------------------------------------------------------------------------------------------------------------------------------------------------------------------------------------------------------------------------------------------------------------------------------------------------------------------------------|-------------------------------------------------|--------|
| 45              | 4.21 | C <sub>20</sub> H <sub>29</sub> NO <sub>6</sub> | 379.1995 | 379.2002 | 1.85  | 380.2075[M+H] <sup>+</sup> , 334.2013[M+H-HCOOH] <sup>+</sup> , 316.1910[M+H-HCOOH-H <sub>2</sub> O] <sup>+</sup> , 215.1075[M+H-2H <sub>2</sub> O-C <sub>6</sub> H <sub>11</sub> NO <sub>2</sub> ] <sup>+</sup>                                                                                                                                                   | Pulchellamine E                                 | [18]   |
| 46 <sup>*</sup> | 4.29 | C <sub>9</sub> H <sub>10</sub> O <sub>3</sub>   | 166.0630 | 166.0635 | 3.01  | 165.0562[M-H] <sup>-</sup> , 147.0452[M-H-H <sub>2</sub> O] <sup>-</sup>                                                                                                                                                                                                                                                                                           | Phloretic acid                                  | [33]   |
| 47 <sup>*</sup> | 4.37 | C <sub>26</sub> H <sub>34</sub> O <sub>12</sub> | 538.2050 | 538.2069 | 3.53  | 537.1986[M-H] <sup>-</sup> , 375.1451[M-H-Glu] <sup>-</sup> , 327.1240[M-H-Glu-H <sub>2</sub> O-CH <sub>3</sub> O] <sup>-</sup> , 297.1136[M-H-Glu-H <sub>2</sub> O-2CH <sub>3</sub> O] <sup>-</sup> , 225.1250[M-H-Glu-C <sub>8</sub> H <sub>7</sub> O <sub>3</sub> ] <sup>-</sup>                                                                                | Lanicepside A                                   | [34]   |
| 48 <sup>*</sup> | 4.44 | C <sub>8</sub> H <sub>8</sub> O <sub>2</sub>    | 136.0524 | 136.0527 | 2.21  | 135.0455[M-H] <sup>-</sup> , 120.0213[M-H-CH <sub>3</sub> ] <sup>-</sup> , 92.0267[M-H-C <sub>3</sub> H <sub>3</sub> O] <sup>-</sup>                                                                                                                                                                                                                               | Curculigoside C                                 | [35]   |
| 49 <sup>*</sup> | 4.44 | C <sub>22</sub> H <sub>26</sub> O <sub>12</sub> | 482.1424 | 482.1439 | 3.11  | 481.1346[M-H] <sup>-</sup> , 197.0455[M-H-Glu-C <sub>7</sub> H <sub>5</sub> O <sub>2</sub> ] <sup>-</sup> , 121.0295[M-H-Glu-C <sub>9</sub> H <sub>9</sub> O <sub>5</sub> ] <sup>-</sup>                                                                                                                                                                           | <i>p</i> -Hydroxyacetophenone                   | [36]   |
| 50 <sup>*</sup> | 4.49 | C <sub>21</sub> H <sub>34</sub> O <sub>9</sub>  | 430.2203 | 430.2220 | 3.95  | 429.2127[M-H] <sup>-</sup> , 401.1817[M-H-C <sub>2</sub> H <sub>4</sub> ] <sup>-</sup> , 267.1603[M-H-Glu] <sup>-</sup>                                                                                                                                                                                                                                            | 4α(15),11β(13)-Tetrahydroidentin B-1 -glucoside | [37]   |
| 51 <sup>*</sup> | 4.56 | C <sub>26</sub> H <sub>34</sub> O <sub>12</sub> | 538.2050 | 538.2067 | 3.16  | 537.2064[M-H] <sup>-</sup> , 327.1240[M-H-Glu-H <sub>2</sub> O-CH <sub>3</sub> O] <sup>-</sup> , 195.0664[M-H-Glu-C <sub>10</sub> H <sub>11</sub> O <sub>3</sub> ] <sup>-</sup> , 161.0464[M-H-C <sub>20</sub> H <sub>24</sub> O <sub>7</sub> ] <sup>-</sup>                                                                                                       | Citrusin A                                      | [38]   |
| 52 <sup>*</sup> | 4.64 | C <sub>26</sub> H <sub>34</sub> O <sub>12</sub> | 538.2050 | 538.2070 | 3.72  | 583.2048[M+HCOO] <sup>-</sup> , 537.1982[M-H] <sup>-</sup> , 375.1442[M-H-Glu] <sup>-</sup> , 327.1245[M-H-Glu-H <sub>2</sub> O-CH <sub>3</sub> O] <sup>-</sup> , 179.0561[M-H-C <sub>20</sub> H <sub>22</sub> O <sub>6</sub> ] <sup>-</sup>                                                                                                                       | Lanicepside B                                   | [34]   |
| 53 <sup>*</sup> | 4.66 | C <sub>32</sub> H <sub>42</sub> O <sub>16</sub> | 682.2473 | 682.2499 | 3.81  | 727.2481[M+HCOO] <sup>-</sup> , 681.2411[M-H] <sup>-</sup> , 519.1877[M-H-Glu] <sup>-</sup> , 339.1242[M-H-2Glu-H <sub>2</sub> O] <sup>-</sup>                                                                                                                                                                                                                     | Pinoresinol diglucoside                         | S      |
| 54 <sup>*</sup> | 4.73 | C <sub>27</sub> H <sub>36</sub> O <sub>13</sub> | 568.2156 | 568.2166 | 1.76  | 613.2188[M+HCOO] <sup>-</sup> , 567.2092[M-H] <sup>-</sup> , 521.2040[M-H-H <sub>2</sub> O-CH <sub>3</sub> O] <sup>-</sup> , 405.1565[M-H-Glu] <sup>-</sup> , 195.0662[M-H-Glu-C <sub>11</sub> H <sub>13</sub> O <sub>4</sub> ] <sup>-</sup>                                                                                                                       | Citrusin B                                      | CFM-ID |
| 55 <sup>*</sup> | 5.01 | C <sub>26</sub> H <sub>36</sub> O <sub>11</sub> | 524.2258 | 524.2240 | -3.43 | 523.2167[M-H] <sup>-</sup> , 507.1880[M-H-CH <sub>3</sub> ] <sup>-</sup> , 361.1690[M-H-Glu] <sup>-</sup> , 346.1771[M-H-Glu-CH <sub>3</sub> ] <sup>-</sup> , 315.1331[M-H-Glu-CH <sub>3</sub> -CH <sub>3</sub> O] <sup>-</sup>                                                                                                                                    | (-)-Secoisolariciresinol-4-O-β-D-glucoside      | [39]   |
| 56 <sup>*</sup> | 5.01 | C <sub>17</sub> H <sub>20</sub> O <sub>9</sub>  | 368.1107 | 368.1116 | 2.44  | 367.1033[M-H] <sup>-</sup> , 179.0346[M-H-C <sub>8</sub> H <sub>12</sub> O <sub>5</sub> ] <sup>-</sup> , 161.0247[M-H-C <sub>8</sub> H <sub>14</sub> O <sub>6</sub> ] <sup>-</sup> , 135.0472[M-H-C <sub>9</sub> H <sub>12</sub> O <sub>7</sub> ] <sup>-</sup>                                                                                                     | Methyl 4-caffeoylquininate                      | [40]   |
| 57 <sup>*</sup> | 5.08 | C <sub>19</sub> H <sub>24</sub> O <sub>8</sub>  | 380.1471 | 380.1484 | 3.42  | 425.1466[M+HCOO] <sup>-</sup> , 379.1404[M-H] <sup>-</sup> , 343.1188[M-H-2H <sub>2</sub> O] <sup>-</sup>                                                                                                                                                                                                                                                          | 15-Hydroxyjanerin                               | CFM-ID |
| 58              | 5.11 | C <sub>21</sub> H <sub>31</sub> NO <sub>6</sub> | 393.2151 | 393.2163 | 3.05  | 416.2095[M+Na] <sup>+</sup> , 394.2241[M+H] <sup>+</sup> , 378.1929[M+H-CH <sub>3</sub> ] <sup>+</sup> , 342.1711[M+H-CH <sub>3</sub> -2H <sub>2</sub> O] <sup>+</sup> , 262.1448[M+H-C <sub>6</sub> H <sub>12</sub> O <sub>2</sub> -H <sub>2</sub> O] <sup>+</sup> , 228.1161[M+H-C <sub>6</sub> H <sub>12</sub> NO <sub>2</sub> -2H <sub>2</sub> O] <sup>+</sup> | Pulchellamine G                                 | [18]   |
| 59 <sup>*</sup> | 5.21 | C <sub>28</sub> H <sub>38</sub> O <sub>13</sub> | 582.2312 | 582.2303 | -1.55 | 581.2230[M-H] <sup>-</sup> , 419.1720[M-H-Glu] <sup>-</sup> , 389.1603[M-H-Glu-CH <sub>3</sub> O] <sup>-</sup> , 373.1298[M-H-Glu-CH <sub>3</sub> -CH <sub>3</sub> O] <sup>-</sup>                                                                                                                                                                                 | Lyoniresinol-3α-glucoside                       | [41]   |
| 60 <sup>*</sup> | 5.28 | C <sub>21</sub> H <sub>18</sub> O <sub>12</sub> | 462.0798 | 462.0806 | 1.73  | 461.0734[M-H] <sup>-</sup> , 285.0404[M-H-Gluac] <sup>-</sup> , 151.0049[M-H-Gluac-C <sub>8</sub> H <sub>6</sub> O <sub>2</sub> ] <sup>-</sup> , 132.0210[M-H-Gluac-C <sub>7</sub> H <sub>4</sub> O <sub>4</sub> ] <sup>-</sup>                                                                                                                                    | Luteolin 7-glucuronide                          | S      |
| 61              | 5.32 | C <sub>27</sub> H <sub>30</sub> O <sub>16</sub> | 610.1534 | 610.1530 | -0.66 | 609.1457[M-H] <sup>-</sup> , 461.0731[M-H-Rha] <sup>-</sup> , 300.0281[M-H-Glu-Rha] <sup>-</sup>                                                                                                                                                                                                                                                                   | Rutin                                           | S      |
| 62 <sup>*</sup> | 5.57 | C <sub>21</sub> H <sub>20</sub> O <sub>12</sub> | 464.0955 | 464.0978 | 4.96  | 463.0906[M-H] <sup>-</sup> , 300.0280[M-H-Glu] <sup>-</sup> , 151.0041[M-H-Glu-C <sub>8</sub> H <sub>5</sub> O <sub>3</sub> ] <sup>-</sup> , 150.0328[M-H-Glu-C <sub>7</sub> H <sub>4</sub> O <sub>4</sub> ] <sup>-</sup>                                                                                                                                          | Isoquercitroside                                | S      |
| 63 <sup>*</sup> | 5.62 | C <sub>19</sub> H <sub>22</sub> O <sub>5</sub>  | 330.1467 | 330.1475 | 2.42  | 375.1447[M+HCOO] <sup>-</sup> , 329.1395[M-H] <sup>-</sup> , 297.1131[M-H-CH <sub>3</sub> -H <sub>2</sub> O] <sup>-</sup> , 282.0899[M-H-CH <sub>3</sub> -CH <sub>2</sub> -H <sub>2</sub> O] <sup>-</sup> , 226.0641[M-H-H <sub>2</sub> O-CH <sub>2</sub> -C <sub>4</sub> H <sub>7</sub> O] <sup>-</sup>                                                           | Aguerin B                                       | [42]   |
| 64 <sup>*</sup> | 5.66 | C <sub>27</sub> H <sub>34</sub> O <sub>12</sub> | 550.2050 | 550.2069 | 3.45  | 595.2042[M+HCOO] <sup>-</sup> , 549.1984[M-H] <sup>-</sup> , 519.1876[M-H-CH <sub>3</sub> O] <sup>-</sup> , 387.1454[M-H-Glu] <sup>-</sup>                                                                                                                                                                                                                         | Saussurenoside                                  | [43]   |

|     |      |                                                 |          |          |       |                                                                                                                                                                                                                                                                                                                                                                   |                                  |        |
|-----|------|-------------------------------------------------|----------|----------|-------|-------------------------------------------------------------------------------------------------------------------------------------------------------------------------------------------------------------------------------------------------------------------------------------------------------------------------------------------------------------------|----------------------------------|--------|
| 65* | 5.72 | C <sub>15</sub> H <sub>10</sub> O <sub>7</sub>  | 302.0427 | 302.0435 | 2.65  | 303.0508[M+H] <sup>+</sup> , 178.0272[M+H-C <sub>6</sub> H <sub>5</sub> O <sub>3</sub> ] <sup>+</sup> , 153.0195[M+H-C <sub>8</sub> H <sub>5</sub> O <sub>3</sub> ] <sup>+</sup> , 108.0216[M+H-H <sub>2</sub> O-C <sub>9</sub> H <sub>5</sub> O <sub>4</sub> ] <sup>+</sup>                                                                                      | Isoetin                          | [44]   |
| 66* | 5.76 | C <sub>25</sub> H <sub>24</sub> O <sub>12</sub> | 516.1268 | 516.1287 | 3.68  | 515.1204[M-H] <sup>-</sup> , 353.0885[M-H-C <sub>9</sub> H <sub>6</sub> O <sub>3</sub> ] <sup>-</sup> , 335.0776[M-H-C <sub>9</sub> H <sub>6</sub> O <sub>4</sub> ] <sup>-</sup> , 191.0570[M-H-2C <sub>9</sub> H <sub>6</sub> O <sub>3</sub> ] <sup>-</sup> , 179.0353[M-H-C <sub>16</sub> H <sub>16</sub> O <sub>8</sub> ] <sup>-</sup>                         | 1,4-Dicaffeoylquinic acid        | S      |
| 67* | 5.96 | C <sub>27</sub> H <sub>30</sub> O <sub>15</sub> | 594.1585 | 594.1598 | 2.19  | 593.1515[M-H] <sup>-</sup> , 285.0407[M-H-Rut] <sup>-</sup>                                                                                                                                                                                                                                                                                                       | Luteolin-7-rutinoside            | [45]   |
| 68* | 6.03 | C <sub>25</sub> H <sub>24</sub> O <sub>12</sub> | 516.1268 | 516.1271 | 0.58  | 515.1198[M-H] <sup>-</sup> , 353.0878[M-H-C <sub>9</sub> H <sub>6</sub> O <sub>3</sub> ] <sup>-</sup> , 191.0561[M-H-2C <sub>9</sub> H <sub>6</sub> O <sub>3</sub> ] <sup>-</sup> , 179.0352[M-H-C <sub>16</sub> H <sub>16</sub> O <sub>8</sub> ] <sup>-</sup>                                                                                                    | 1,5-Dicaffeoylquinic acid        | S      |
| 69* | 6.06 | C <sub>28</sub> H <sub>32</sub> O <sub>16</sub> | 624.1690 | 624.1720 | 4.81  | 623.1647[M-H] <sup>-</sup> , 351.0735[M-H-ORha-C <sub>6</sub> H <sub>4</sub> O <sub>2</sub> ] <sup>-</sup> , 315.0530[M-H-Rut] <sup>-</sup>                                                                                                                                                                                                                       | Narcisin                         | S      |
| 70* | 6.15 | C <sub>27</sub> H <sub>30</sub> O <sub>14</sub> | 578.1636 | 578.1653 | 2.94  | 577.1580[M-H] <sup>-</sup> , 269.0474[M-H-Neo] <sup>-</sup>                                                                                                                                                                                                                                                                                                       | Rhoifolin                        | [46]   |
| 71* | 6.18 | C <sub>21</sub> H <sub>18</sub> O <sub>11</sub> | 446.0849 | 446.0868 | 4.26  | 445.0791[M-H] <sup>-</sup> , 284.0322[M-H-Glu] <sup>-</sup> , 269.0464[M-H-OGlu] <sup>-</sup>                                                                                                                                                                                                                                                                     | Rhein-8-glucoside                | [47]   |
| 72  | 6.29 | C <sub>22</sub> H <sub>26</sub> O <sub>8</sub>  | 418.1628 | 418.1639 | 2.63  | 417.1567[M-H] <sup>-</sup> , 402.1271[M-H-CH <sub>3</sub> ] <sup>-</sup> , 387.1080[M-H-2CH <sub>3</sub> ] <sup>-</sup> , 181.0521[M-H-C <sub>13</sub> H <sub>11</sub> O <sub>4</sub> ] <sup>-</sup>                                                                                                                                                              | Syringaresinol                   | S      |
| 73  | 6.29 | C <sub>21</sub> H <sub>20</sub> O <sub>11</sub> | 448.1006 | 448.1021 | 3.35  | 447.0938[M-H] <sup>-</sup> , 301.0375[M-H-Rha] <sup>-</sup> , 283.0255[M-H-Rha-H <sub>2</sub> O] <sup>-</sup> , 151.0043[M-H-Rha-C <sub>8</sub> H <sub>5</sub> O <sub>3</sub> ] <sup>-</sup>                                                                                                                                                                      | Quercitrin                       | S      |
| 74  | 6.31 | C <sub>26</sub> H <sub>32</sub> O <sub>12</sub> | 536.1894 | 536.1901 | 1.31  | 535.1823[M-H] <sup>-</sup> , 501.1768[M-H-2H <sub>2</sub> O] <sup>-</sup> , 355.1188[M-H-Glu-H <sub>2</sub> O] <sup>-</sup> , 151.0405[M-H-Glu-C <sub>12</sub> H <sub>13</sub> O <sub>4</sub> ] <sup>-</sup>                                                                                                                                                      | 1-Hydroxypinoresinol-1-glucoside | [48]   |
| 75* | 6.36 | C <sub>21</sub> H <sub>20</sub> O <sub>10</sub> | 432.1056 | 432.1075 | 4.40  | 477.1057[M+HCOO] <sup>-</sup> , 431.0993[M-H] <sup>-</sup> , 285.0405[M-H-Rha] <sup>-</sup> , 161.0464[M-H-C <sub>13</sub> H <sub>10</sub> O <sub>5</sub> ] <sup>-</sup>                                                                                                                                                                                          | Afzelin                          | [49]   |
| 76* | 6.45 | C <sub>25</sub> H <sub>24</sub> O <sub>12</sub> | 516.1268 | 516.1292 | 4.65  | 515.1219[M-H] <sup>-</sup> , 353.0891[M-H-C <sub>9</sub> H <sub>6</sub> O <sub>3</sub> ] <sup>-</sup> , 191.0579[M-H-2C <sub>9</sub> H <sub>6</sub> O <sub>3</sub> ] <sup>-</sup> , 179.0359[M-H-C <sub>16</sub> H <sub>16</sub> O <sub>8</sub> ] <sup>-</sup>                                                                                                    | 4,5-Dicaffeoylquinic acid        | S      |
| 77* | 6.47 | C <sub>21</sub> H <sub>20</sub> O <sub>10</sub> | 432.1056 | 432.1071 | 3.47  | 431.0988[M-H] <sup>-</sup> , 269.0461[M-H-Glu] <sup>-</sup>                                                                                                                                                                                                                                                                                                       | Cosmosiin                        | [49]   |
| 78* | 6.57 | C <sub>26</sub> H <sub>32</sub> O <sub>11</sub> | 520.1945 | 520.1931 | -2.71 | 565.1913[M+HCOO] <sup>+</sup> , 519.1851[M-H] <sup>-</sup> , 357.1323[M-H-Glu] <sup>-</sup> , 151.0387[M-H-Glu-C <sub>12</sub> H <sub>13</sub> O <sub>3</sub> ] <sup>-</sup>                                                                                                                                                                                      | Pinoresinol 4-glucoside          | S      |
| 79* | 6.63 | C <sub>9</sub> H <sub>16</sub> O <sub>4</sub>   | 188.1049 | 188.1050 | 0.53  | 187.0977[M-H] <sup>-</sup> , 143.1081[M-H-HCOOH] <sup>-</sup> , 125.0968[M-H-H <sub>2</sub> O-HCOOH] <sup>-</sup>                                                                                                                                                                                                                                                 | Azelaic acid                     | [50]   |
| 80* | 6.67 | C <sub>22</sub> H <sub>22</sub> O <sub>11</sub> | 462.1162 | 462.1151 | -2.38 | 461.1078[M-H] <sup>-</sup> , 446.0853[M-H-CH <sub>3</sub> ] <sup>-</sup> , 298.0472[M-H-Glu] <sup>-</sup> , 283.0244[M-H-Glu-CH <sub>3</sub> ] <sup>-</sup>                                                                                                                                                                                                       | Thermopsoside                    | [51]   |
| 81* | 6.82 | C <sub>34</sub> H <sub>30</sub> O <sub>15</sub> | 678.1585 | 678.1606 | 3.10  | 677.1513[M-H] <sup>-</sup> , 515.1194[M-H-C <sub>9</sub> H <sub>6</sub> O <sub>3</sub> ] <sup>-</sup> , 497.1098[M-H-C <sub>9</sub> H <sub>6</sub> O <sub>4</sub> ] <sup>-</sup> , 353.0881[M-H-2C <sub>9</sub> H <sub>6</sub> O <sub>3</sub> ] <sup>-</sup> , 179.0346[M-H-C <sub>25</sub> H <sub>22</sub> O <sub>11</sub> ] <sup>-</sup>                        | 1,3,5-Tricaffeoylquinic acid     | [52]   |
| 82* | 6.89 | C <sub>20</sub> H <sub>26</sub> O <sub>8</sub>  | 394.1628 | 394.1641 | 3.30  | 417.1533[M+Na] <sup>+</sup> , 395.1713[M+H] <sup>+</sup> , 359.1508[M+H-2H <sub>2</sub> O] <sup>+</sup> , 350.1378[M+H-C <sub>2</sub> H <sub>5</sub> O] <sup>+</sup> , 327.1243[M+H-2H <sub>2</sub> O-CH <sub>3</sub> O] <sup>+</sup> , 229.0776[M+H-C <sub>2</sub> H <sub>5</sub> O-H <sub>2</sub> O-C <sub>4</sub> H <sub>7</sub> O <sub>3</sub> ] <sup>+</sup> | Methoxyjanerin                   | [53]   |
| 83* | 6.93 | C <sub>20</sub> H <sub>26</sub> O <sub>6</sub>  | 362.1729 | 362.1737 | 2.21  | 361.1664[M-H] <sup>-</sup> , 346.1428[M-H-CH <sub>3</sub> ] <sup>-</sup> , 327.1231[M-H-H <sub>2</sub> O-CH <sub>3</sub> ] <sup>-</sup> , 315.1247[M-H-CH <sub>3</sub> -CH <sub>3</sub> O] <sup>-</sup> , 165.0563[M-H-C <sub>10</sub> H <sub>13</sub> O <sub>3</sub> -CH <sub>3</sub> ] <sup>-</sup>                                                             | Secoisolariciresinol             | S      |
| 84* | 7.00 | C <sub>21</sub> H <sub>22</sub> O <sub>7</sub>  | 386.1366 | 386.1361 | -1.29 | 387.1434[M+H] <sup>+</sup> , 163.0400[M+H-C <sub>10</sub> H <sub>10</sub> O <sub>4</sub> -2CH <sub>3</sub> ] <sup>+</sup> , 135.0453[M+H-C <sub>13</sub> H <sub>16</sub> O <sub>5</sub> ] <sup>+</sup>                                                                                                                                                            | Conicaol B                       | [54]   |
| 85* | 7.06 | C <sub>26</sub> H <sub>32</sub> O <sub>11</sub> | 520.1945 | 520.1959 | 2.69  | 519.1876[M-H] <sup>-</sup> , 357.1345[M-H-Glu] <sup>-</sup> , 342.1116[M-H-Glu-CH <sub>3</sub> ] <sup>-</sup> , 121.0305[M-H-Glu-C <sub>13</sub> H <sub>15</sub> O <sub>4</sub> ] <sup>-</sup>                                                                                                                                                                    | Matairesinoside                  | S      |
| 86* | 7.09 | C <sub>20</sub> H <sub>28</sub> O <sub>7</sub>  | 380.1835 | 380.1852 | 4.47  | 425.1827[M+HCOO] <sup>-</sup> , 379.1772[M-H] <sup>-</sup> , 221.0840[M-H-C <sub>8</sub> H <sub>14</sub> O <sub>3</sub> ] <sup>-</sup> , 209.0834[M-H-C <sub>9</sub> H <sub>14</sub> O <sub>3</sub> ] <sup>-</sup>                                                                                                                                                | Elemacarmanin                    | CFM-ID |



|      |      |                                                               |          |          |       |                                                                                                                                                                                                                                                                                                                                                                                                                  |                                                       |        |
|------|------|---------------------------------------------------------------|----------|----------|-------|------------------------------------------------------------------------------------------------------------------------------------------------------------------------------------------------------------------------------------------------------------------------------------------------------------------------------------------------------------------------------------------------------------------|-------------------------------------------------------|--------|
| 87*  | 7.10 | C <sub>18</sub> H <sub>22</sub> O <sub>6</sub>                | 334.1416 | 334.1421 | 1.50  | 357.1353[M+Na] <sup>+</sup> , 335.1502[M+H] <sup>+</sup> ,<br>317.1404[M+H-H <sub>2</sub> O] <sup>+</sup> , 137.0614[M+H-<br>H <sub>2</sub> O-C <sub>8</sub> H <sub>8</sub> O-C <sub>2</sub> H <sub>5</sub> O <sub>2</sub> ] <sup>+</sup>                                                                                                                                                                        | 7 $\alpha$ -Hydroxygerin                              | [55]   |
| 88*  | 7.14 | C <sub>20</sub> H <sub>22</sub> O <sub>4</sub>                | 326.1518 | 326.1524 | 1.84  | 327.1597[M+H] <sup>+</sup> , 203.1089[M+H-C <sub>7</sub> H <sub>8</sub> O <sub>2</sub> ] <sup>+</sup> ,<br>189.0924[M+H-C <sub>7</sub> H <sub>7</sub> O <sub>2</sub> -CH <sub>3</sub> ] <sup>+</sup> ,<br>137.0614[M+H-C <sub>12</sub> H <sub>14</sub> O <sub>2</sub> ] <sup>+</sup>                                                                                                                             | Dehydrodiisoeugenol<br>1                              | [56]   |
| 89*  | 7.28 | C <sub>22</sub> H <sub>24</sub> O <sub>8</sub>                | 416.1471 | 416.1469 | -0.48 | 417.1542[M+H] <sup>+</sup> , 399.1435[M+H-H <sub>2</sub> O] <sup>+</sup> ,<br>358.1362[M+H-C <sub>2</sub> H <sub>5</sub> O <sub>2</sub> ] <sup>+</sup> , 137.0613[M+H-<br>H <sub>2</sub> O-C <sub>14</sub> H <sub>14</sub> O <sub>5</sub> ] <sup>+</sup>                                                                                                                                                         | Acetoxypinoresinol                                    | CFM-ID |
| 90*  | 7.35 | C <sub>30</sub> H <sub>34</sub> O <sub>10</sub>               | 554.2152 | 554.2171 | 3.43  | 553.2089[M-H] <sup>-</sup> , 535.1990[M-H-H <sub>2</sub> O] <sup>-</sup> ,<br>357.1352[M-H-H <sub>2</sub> O-C <sub>10</sub> H <sub>10</sub> O <sub>3</sub> ] <sup>-</sup> ,<br>181.0877[M-H-C <sub>20</sub> H <sub>20</sub> O <sub>7</sub> ] <sup>-</sup>                                                                                                                                                        | Lappaol E                                             | [57]   |
| 91*  | 7.49 | C <sub>18</sub> H <sub>18</sub> O <sub>3</sub>                | 282.1256 | 282.1267 | 3.90  | 327.1249[M+HCOO] <sup>-</sup> , 239.0726[M-H-<br>C <sub>3</sub> H <sub>6</sub> ] <sup>-</sup> , 197.0626[M-H-C <sub>3</sub> H <sub>5</sub> -C <sub>2</sub> H <sub>3</sub> -H <sub>2</sub> O] <sup>-</sup> ,<br>163.0405[M-H-C <sub>9</sub> H <sub>10</sub> ] <sup>-</sup>                                                                                                                                        | Obovatol                                              | [58]   |
| 92*  | 7.50 | C <sub>20</sub> H <sub>20</sub> O <sub>5</sub>                | 340.1311 | 340.1321 | 2.94  | 339.1248[M-H] <sup>-</sup> , 324.1008[M-H-CH <sub>3</sub> ] <sup>-</sup> ,<br>293.0825[M-H-CH <sub>3</sub> -CH <sub>3</sub> O] <sup>-</sup> , 265.0519[M-<br>H-H <sub>2</sub> O-C <sub>4</sub> H <sub>8</sub> ] <sup>-</sup>                                                                                                                                                                                     | Licocoumarone                                         | [59]   |
| 93*  | 7.51 | C <sub>20</sub> H <sub>22</sub> O <sub>6</sub>                | 358.1416 | 358.1425 | 2.51  | 357.1342[M-H] <sup>-</sup> , 342.1117[M-H-CH <sub>3</sub> ] <sup>-</sup> ,<br>151.0405[M-H-C <sub>12</sub> H <sub>16</sub> O <sub>3</sub> ] <sup>-</sup> , 136.0538[M-<br>H-C <sub>12</sub> H <sub>11</sub> O <sub>3</sub> -H <sub>2</sub> O] <sup>-</sup>                                                                                                                                                       | Pinoresinol                                           | S      |
| 94*  | 7.68 | C <sub>30</sub> H <sub>34</sub> O <sub>10</sub>               | 554.2152 | 554.2168 | 2.89  | 553.2095[M-H] <sup>-</sup> , 535.1954[M-H-H <sub>2</sub> O] <sup>-</sup> ,<br>517.1888[M-H-2H <sub>2</sub> O] <sup>-</sup>                                                                                                                                                                                                                                                                                       | Lappaol C                                             | [60]   |
| 95*  | 7.72 | C <sub>17</sub> H <sub>20</sub> O <sub>4</sub>                | 288.1362 | 288.1376 | 4.86  | 311.1268[M+Na] <sup>+</sup> , 289.1457[M+H] <sup>+</sup> ,<br>230.1312[M+H-C <sub>2</sub> H <sub>5</sub> O <sub>2</sub> ] <sup>+</sup> , 202.1370[M+H-<br>C <sub>2</sub> H <sub>5</sub> O <sub>2</sub> -CO] <sup>+</sup>                                                                                                                                                                                         | 8 $\alpha$ -<br>Acetoxylactone                        | [61]   |
| 96*  | 8.00 | C <sub>27</sub> H <sub>34</sub> O <sub>11</sub>               | 534.2101 | 534.2118 | 3.18  | 579.2090[M+HCOO] <sup>-</sup> , 533.2035[M-H] <sup>-</sup> ,<br>371.1512[M-H-Glu] <sup>-</sup> , 356.1280[M-H-<br>Glu-CH <sub>3</sub> ] <sup>-</sup> , 136.0535[M-H-Glu-<br>C <sub>13</sub> H <sub>14</sub> O <sub>4</sub> ] <sup>-</sup> , 121.0306[M-H-Glu-CH <sub>3</sub> -<br>C <sub>13</sub> H <sub>14</sub> O <sub>4</sub> ] <sup>-</sup>                                                                  | Arctiin                                               | S      |
| 97*  | 8.18 | C <sub>15</sub> H <sub>10</sub> O <sub>6</sub>                | 286.0477 | 286.0488 | 3.85  | 285.0415[M-H] <sup>-</sup> , 151.0044[M-H-C <sub>6</sub> H <sub>6</sub> O <sub>2</sub> ] <sup>-</sup> ,<br>133.0308[M-H-C <sub>7</sub> H <sub>4</sub> O <sub>4</sub> ] <sup>-</sup> , 107.0144[M-H-<br>C <sub>9</sub> H <sub>6</sub> O <sub>4</sub> ] <sup>-</sup>                                                                                                                                               | Luteolin                                              | S      |
| 98*  | 8.23 | C <sub>8</sub> H <sub>8</sub> O <sub>2</sub>                  | 136.0524 | 136.0521 | -2.21 | 137.0613[M+H] <sup>+</sup> , 122.0364[M+H-CH <sub>3</sub> ] <sup>+</sup> ,<br>94.0407[M+H-C <sub>2</sub> H <sub>5</sub> O] <sup>+</sup>                                                                                                                                                                                                                                                                          | Phenyl acetate                                        | [62]   |
| 99*  | 8.24 | C <sub>34</sub> H <sub>30</sub> O <sub>15</sub>               | 678.1585 | 678.1614 | 4.28  | 677.1521[M-H] <sup>-</sup> , 515.1210[M-H-C <sub>6</sub> H <sub>6</sub> O <sub>3</sub> ] <sup>-</sup> ,<br>353.0895[M-H-2C <sub>9</sub> H <sub>6</sub> O <sub>3</sub> ] <sup>-</sup> , 335.0788[M-<br>H-C <sub>9</sub> H <sub>7</sub> O <sub>3</sub> -C <sub>9</sub> H <sub>7</sub> O <sub>4</sub> ] <sup>-</sup> , 179.0352[M-H-<br>C <sub>25</sub> H <sub>22</sub> O <sub>11</sub> ] <sup>-</sup>              | 3,4,5-<br>Tricaffeoylquinic<br>acid                   | [63]   |
| 100* | 8.26 | C <sub>21</sub> H <sub>24</sub> O <sub>6</sub>                | 372.1573 | 372.1583 | 2.69  | 373.1656[M+H] <sup>+</sup> , 355.1549[M+H-H <sub>2</sub> O] <sup>+</sup> ,<br>137.0617[M+H-C <sub>13</sub> H <sub>16</sub> O <sub>4</sub> ] <sup>+</sup> ,<br>122.0386[M+H-C <sub>14</sub> H <sub>19</sub> O <sub>4</sub> ] <sup>+</sup>                                                                                                                                                                         | Phillygenin                                           | S      |
| 101* | 8.46 | C <sub>30</sub> H <sub>36</sub> O <sub>9</sub>                | 540.2359 | 540.2381 | 4.07  | 585.2352[M+HCOO] <sup>-</sup> , 539.2308[M-H] <sup>-</sup> ,<br>521.2194[M-H-H <sub>2</sub> O] <sup>-</sup> , 509.2192[M-H-<br>CH <sub>3</sub> O] <sup>-</sup> , 371.1505[M-H-CH <sub>3</sub> O-C <sub>8</sub> H <sub>6</sub> O <sub>2</sub> ] <sup>-</sup> ,<br>297.1145[M-H-H <sub>2</sub> O-C <sub>12</sub> H <sub>16</sub> O <sub>4</sub> ] <sup>-</sup>                                                     | Sesquipinsapol B                                      | [64]   |
| 102* | 8.54 | C <sub>16</sub> H <sub>12</sub> O <sub>7</sub>                | 316.0583 | 316.0596 | 4.11  | 317.0668[M+H] <sup>+</sup> , 302.0429 [M+H-CH <sub>3</sub> ] <sup>+</sup> ,<br>168.0062[M+H-CH <sub>3</sub> -C <sub>8</sub> H <sub>6</sub> O <sub>2</sub> ] <sup>+</sup> ,<br>140.0506[M+H-C <sub>9</sub> H <sub>5</sub> O <sub>4</sub> ] <sup>+</sup>                                                                                                                                                           | Eupafolin                                             | S      |
| 103* | 9.04 | C <sub>15</sub> H <sub>24</sub> O <sub>2</sub>                | 236.1776 | 236.1786 | 4.23  | 237.1858[M+H] <sup>+</sup> , 219.1771[M+H-H <sub>2</sub> O] <sup>+</sup> ,<br>108.0945[M+H-C <sub>7</sub> H <sub>13</sub> O <sub>2</sub> ] <sup>+</sup> , 92.0631[M+H-<br>C <sub>3</sub> H <sub>7</sub> O-H <sub>2</sub> O-C <sub>3</sub> H <sub>8</sub> ] <sup>+</sup>                                                                                                                                          | Eudesma-<br>4(14),11(13)-diene-<br>3 $\beta$ ,12-diol | [65]   |
| 104* | 9.08 | C <sub>31</sub> H <sub>36</sub> O <sub>10</sub>               | 568.2308 | 568.2328 | 3.52  | 567.2256[M-H] <sup>-</sup> , 535.1982[M-H-CH <sub>3</sub> O] <sup>-</sup> ,<br>517.1888[M-H-H <sub>2</sub> O-CH <sub>3</sub> O] <sup>-</sup> ,<br>191.0714[M-H-C <sub>20</sub> H <sub>24</sub> O <sub>7</sub> ] <sup>-</sup>                                                                                                                                                                                     | Lappaol D                                             | [60]   |
| 105* | 9.28 | C <sub>34</sub> H <sub>37</sub> N <sub>3</sub> O <sub>6</sub> | 583.2682 | 583.2684 | 0.34  | 584.2757[M+H] <sup>+</sup> , 438.2385[M+H-C <sub>9</sub> H <sub>6</sub> O <sub>2</sub> ] <sup>+</sup> ,<br>292.2026[M+H-2C <sub>9</sub> H <sub>6</sub> O <sub>2</sub> ] <sup>+</sup> ,<br>275.1765[M+H-C <sub>9</sub> H <sub>6</sub> O <sub>2</sub> -C <sub>9</sub> H <sub>6</sub> NO <sub>2</sub> ] <sup>+</sup> ,<br>147.0453[M+H-C <sub>25</sub> H <sub>31</sub> N <sub>3</sub> O <sub>4</sub> ] <sup>+</sup> | N1,N5,N10-Tri- <i>p</i> -<br>coumaroylspermidin<br>e  | [66]   |

|      |       |                                                               |          |          |       |                                                                                                                                                                                                                                                                                                                                                                                                                            |                                                   |        |
|------|-------|---------------------------------------------------------------|----------|----------|-------|----------------------------------------------------------------------------------------------------------------------------------------------------------------------------------------------------------------------------------------------------------------------------------------------------------------------------------------------------------------------------------------------------------------------------|---------------------------------------------------|--------|
| 106* | 9.33  | C <sub>15</sub> H <sub>10</sub> O <sub>5</sub>                | 270.0528 | 270.0539 | 4.07  | 269.0456[M-H] <sup>-</sup> , 151.0039[M-H-C <sub>8</sub> H <sub>6</sub> O] <sup>-</sup> ,<br>117.0356[M-H-C <sub>7</sub> H <sub>8</sub> O <sub>4</sub> ] <sup>-</sup> , 107.0145[M-H-C <sub>8</sub> H <sub>6</sub> O <sub>3</sub> ] <sup>-</sup>                                                                                                                                                                           | Apigenin                                          | S      |
| 107  | 9.38  | C <sub>26</sub> H <sub>30</sub> N <sub>2</sub> O <sub>6</sub> | 466.2104 | 466.2087 | -3.65 | 489.1989[M+Na] <sup>+</sup> , 467.2160[M+H] <sup>+</sup> ,<br>321.1205[M+H-CH <sub>3</sub> -C <sub>9</sub> H <sub>9</sub> N] <sup>+</sup> ,<br>303.1119[M+H-H <sub>2</sub> O-CH <sub>3</sub> -C <sub>9</sub> H <sub>9</sub> N] <sup>+</sup> ,<br>265.1430[M+H-C <sub>11</sub> H <sub>10</sub> N <sub>2</sub> O <sub>2</sub> ] <sup>+</sup> ,<br>202.0747[M+H-C <sub>15</sub> H <sub>21</sub> O <sub>4</sub> ] <sup>+</sup> | Pulchellamine F                                   | [18]   |
| 108* | 9.47  | C <sub>20</sub> H <sub>22</sub> O <sub>6</sub>                | 358.1416 | 358.1431 | 4.19  | 357.1348[M-H] <sup>-</sup> , 342.1113[M-H-CH <sub>3</sub> ] <sup>-</sup> ,<br>179.0718[M-H-C <sub>10</sub> H <sub>10</sub> O <sub>3</sub> ] <sup>-</sup> , 165.0563[M-H-C <sub>10</sub> H <sub>9</sub> O <sub>3</sub> -CH <sub>3</sub> ] <sup>-</sup> , 122.0370[M-H-C <sub>13</sub> H <sub>15</sub> O <sub>4</sub> ] <sup>-</sup>                                                                                         | Matairesinol                                      | S      |
| 109* | 9.61  | C <sub>16</sub> H <sub>12</sub> O <sub>6</sub>                | 300.0634 | 300.0640 | 2.00  | 299.0568[M-H] <sup>-</sup> , 284.0330[M-H-CH <sub>3</sub> ] <sup>-</sup> ,<br>256.0384[M-H-C <sub>2</sub> H <sub>5</sub> O] <sup>-</sup> , 161.0246[M-H-C <sub>7</sub> H <sub>6</sub> O <sub>3</sub> ] <sup>-</sup>                                                                                                                                                                                                        | Hispidulin                                        | S      |
| 110* | 9.71  | C <sub>18</sub> H <sub>22</sub> O <sub>5</sub>                | 318.1467 | 318.1476 | 2.83  | 341.1378[M+Na] <sup>+</sup> , 319.1556[M+H] <sup>+</sup> ,<br>287.1297[M+H-CH <sub>3</sub> O] <sup>+</sup> , 189.0917[M+H-C <sub>2</sub> H <sub>4</sub> O-C <sub>4</sub> H <sub>6</sub> O <sub>2</sub> ] <sup>+</sup>                                                                                                                                                                                                      | Gerin                                             | [55]   |
| 111* | 9.81  | C <sub>18</sub> H <sub>32</sub> O <sub>5</sub>                | 328.2250 | 328.2260 | 3.05  | 327.2228[M-H] <sup>-</sup> , 291.1969[M-H-2H <sub>2</sub> O] <sup>-</sup> ,<br>229.1455[M-H-C <sub>6</sub> H <sub>10</sub> O] <sup>-</sup> , 183.1392[M-H-H <sub>2</sub> O-C <sub>7</sub> H <sub>10</sub> O <sub>2</sub> ] <sup>-</sup> , 171.1040[M-H-C <sub>9</sub> H <sub>16</sub> O <sub>2</sub> ] <sup>-</sup>                                                                                                        | Malyngic acid                                     | CFM-ID |
| 112  | 10.05 | C <sub>16</sub> H <sub>28</sub> O <sub>2</sub>                | 252.2089 | 252.2099 | 3.96  | 275.2001[M+Na] <sup>+</sup> , 253.2178[M+H] <sup>+</sup> ,<br>219.1756[M+H-H <sub>2</sub> O-CH <sub>3</sub> ] <sup>+</sup> ,<br>149.0969[M+H-CH <sub>3</sub> -C <sub>5</sub> H <sub>11</sub> O] <sup>+</sup>                                                                                                                                                                                                               | 7δ-Methoxy-4(14)-<br>oppositen-1β-ol              | [67]   |
| 113* | 10.61 | C <sub>15</sub> H <sub>22</sub> O <sub>2</sub>                | 234.1620 | 234.1623 | 1.28  | 235.1705[M+H] <sup>+</sup> , 177.1273[M+H-H <sub>2</sub> O-C <sub>3</sub> H <sub>4</sub> ] <sup>+</sup> , 163.1480[M+H-C <sub>3</sub> H <sub>2</sub> O <sub>2</sub> ] <sup>+</sup> ,<br>121.0663[M+H-H <sub>2</sub> O-C <sub>7</sub> H <sub>12</sub> ] <sup>+</sup>                                                                                                                                                        | Germacra-<br>1(10),4,11(13)-trien-<br>12-oic acid | [68]   |
| 114* | 10.65 | C <sub>18</sub> H <sub>34</sub> O <sub>5</sub>                | 330.2406 | 330.2417 | 3.33  | 329.2335[M-H] <sup>-</sup> , 229.1447[M-H-C <sub>6</sub> H <sub>12</sub> O] <sup>-</sup> ,<br>211.1343[M-H-C <sub>6</sub> H <sub>12</sub> O-H <sub>2</sub> O] <sup>-</sup> ,<br>99.0814[M-H-C <sub>12</sub> H <sub>22</sub> O <sub>4</sub> ] <sup>-</sup>                                                                                                                                                                  | 9,12,13-TriHOME                                   | CFM-ID |
| 115* | 10.69 | C <sub>30</sub> H <sub>32</sub> O <sub>9</sub>                | 536.2046 | 536.2063 | 3.17  | 535.2021[M-H] <sup>-</sup> , 505.1877[M-H-CH <sub>3</sub> O] <sup>-</sup> ,<br>490.1633[M-H-CH <sub>3</sub> -CH <sub>3</sub> O] <sup>-</sup>                                                                                                                                                                                                                                                                               | Lappaol A                                         | [69]   |
| 116* | 10.96 | C <sub>21</sub> H <sub>24</sub> O <sub>6</sub>                | 372.1573 | 372.1587 | 3.76  | 371.1501[M-H] <sup>-</sup> , 356.1264[M-H-CH <sub>3</sub> ] <sup>-</sup> ,<br>136.0528[M-H-C <sub>13</sub> H <sub>15</sub> O <sub>4</sub> ] <sup>-</sup> , 121.0094[M-H-C <sub>13</sub> H <sub>15</sub> O <sub>4</sub> -CH <sub>3</sub> ] <sup>-</sup> , 83.0144[M-H-C <sub>9</sub> H <sub>11</sub> O <sub>2</sub> -C <sub>8</sub> H <sub>9</sub> O <sub>2</sub> ] <sup>-</sup>                                            | Arctigenin                                        | S      |
| 117* | 11.14 | C <sub>21</sub> H <sub>22</sub> O <sub>6</sub>                | 370.1416 | 370.1421 | 1.35  | 371.1493[M+H] <sup>+</sup> , 219.0652[M+H-C <sub>9</sub> H <sub>12</sub> O <sub>2</sub> ] <sup>+</sup> , 151.0766[M+H-C <sub>12</sub> H <sub>12</sub> O <sub>4</sub> ] <sup>+</sup> ,<br>137.0606[M+H-C <sub>13</sub> H <sub>14</sub> O <sub>4</sub> ] <sup>+</sup> ,<br>107.0500[M+H-C <sub>13</sub> H <sub>14</sub> O <sub>4</sub> -CH <sub>3</sub> O] <sup>+</sup>                                                      | (+)-7,8-<br>Didehydroarctigenin                   | [70]   |
| 118* | 12.10 | C <sub>15</sub> H <sub>20</sub> O <sub>2</sub>                | 232.1463 | 232.1472 | 3.88  | 233.1545[M+H] <sup>+</sup> , 203.1084[M+H-2CH <sub>3</sub> ] <sup>+</sup> ,<br>189.1630[M+H-CO <sub>2</sub> ] <sup>+</sup> , 149.1335[M+H-C <sub>4</sub> H <sub>4</sub> O <sub>2</sub> ] <sup>+</sup>                                                                                                                                                                                                                      | Costunolide                                       | [68]   |
| 119* | 12.94 | C <sub>15</sub> H <sub>22</sub> O <sub>2</sub>                | 234.1620 | 234.1625 | 2.14  | 235.1699[M+H] <sup>+</sup> , 161.1320[M+H-C <sub>3</sub> H <sub>6</sub> O <sub>2</sub> ] <sup>+</sup> ,<br>133.1022[M+H-C <sub>3</sub> H <sub>10</sub> O <sub>2</sub> ] <sup>+</sup> , 121.1026[M+H-C <sub>6</sub> H <sub>10</sub> O <sub>2</sub> ] <sup>+</sup> , 81.0712[M+H-C <sub>9</sub> H <sub>14</sub> O <sub>2</sub> ] <sup>+</sup>                                                                                | Costic acid                                       | [71]   |
| 120* | 14.58 | C <sub>42</sub> H <sub>46</sub> O <sub>12</sub>               | 742.2989 | 742.2978 | -1.48 | 765.2856[M+Na] <sup>+</sup> , 743.3051[M+H] <sup>+</sup> ,<br>725.2928[M+H-H <sub>2</sub> O] <sup>+</sup> , 707.2841[M+H-2H <sub>2</sub> O] <sup>+</sup> , 151.0763[M+H-C <sub>33</sub> H <sub>36</sub> O <sub>10</sub> ] <sup>+</sup> ,<br>137.0601[M+H-C <sub>13</sub> H <sub>15</sub> O <sub>4</sub> -C <sub>21</sub> H <sub>23</sub> O <sub>6</sub> ] <sup>+</sup>                                                     | Diarctigenin                                      | [72]   |
| 121* | 15.17 | C <sub>42</sub> H <sub>46</sub> O <sub>12</sub>               | 742.2989 | 742.2991 | 0.27  | 765.2867[M+Na] <sup>+</sup> , 743.3063[M+H] <sup>+</sup> ,<br>725.2951[M+H-H <sub>2</sub> O] <sup>+</sup> , 707.2834[M+H-2H <sub>2</sub> O] <sup>+</sup> , 151.0465[M+H-C <sub>33</sub> H <sub>36</sub> O <sub>10</sub> ] <sup>+</sup> ,<br>137.0612[M+H-C <sub>34</sub> H <sub>38</sub> O <sub>10</sub> ] <sup>+</sup>                                                                                                    | Conicaol A                                        | [72]   |
| 122* | 15.41 | C <sub>28</sub> H <sub>50</sub> O <sub>2</sub>                | 418.3811 | 418.3830 | 4.54  | 441.3725[M+Na] <sup>+</sup> , 419.3898[M+H] <sup>+</sup> ,<br>259.2380[M+H-H <sub>2</sub> O-C <sub>9</sub> H <sub>18</sub> O] <sup>+</sup> ,<br>151.1500[M+H-H <sub>2</sub> O-C <sub>17</sub> H <sub>30</sub> O] <sup>+</sup> ,<br>95.0880[M+H-H <sub>2</sub> O-C <sub>21</sub> H <sub>38</sub> O] <sup>+</sup>                                                                                                            | Ergostane-3,24-diol                               | CFM-ID |
| 123* | 16.06 | C <sub>15</sub> H <sub>18</sub> O <sub>2</sub>                | 230.1307 | 230.1315 | 3.48  | 231.1388[M+H] <sup>+</sup> , 203.1441[M+H-CO] <sup>+</sup> ,<br>121.1028[M+H-C <sub>6</sub> H <sub>6</sub> O <sub>2</sub> ] <sup>+</sup> , 105.0718[M+H-C <sub>7</sub> H <sub>10</sub> O <sub>2</sub> ] <sup>+</sup>                                                                                                                                                                                                       | Dehydrocostus<br>lactone                          | S      |

|      |       |                                                               |          |          |       |                                                                                                                                                                                                                                                                                            |                                     |        |
|------|-------|---------------------------------------------------------------|----------|----------|-------|--------------------------------------------------------------------------------------------------------------------------------------------------------------------------------------------------------------------------------------------------------------------------------------------|-------------------------------------|--------|
| 124* | 16.35 | C <sub>26</sub> H <sub>48</sub> NO <sub>7</sub><br>P          | 517.3168 | 517.3181 | 2.51  | 518.3254[M+H] <sup>+</sup> , 184.0744[M+H–C <sub>21</sub> H <sub>34</sub> O <sub>3</sub> ] <sup>+</sup> , 104.1100[M+H–C <sub>21</sub> H <sub>35</sub> O <sub>6</sub> P] <sup>+</sup> , 86.0986[M+H–C <sub>21</sub> H <sub>37</sub> O <sub>7</sub> P] <sup>+</sup>                         | LPC (18:3)                          | CFM-ID |
| 125* | 16.40 | C <sub>15</sub> H <sub>22</sub> O                             | 218.1671 | 218.1680 | 4.13  | 219.1757[M+H] <sup>+</sup> , 203.1444[M+H–CH <sub>3</sub> ] <sup>+</sup> , 162.1419[M+H–C <sub>3</sub> H <sub>5</sub> O] <sup>+</sup>                                                                                                                                                      | Germacra-1(10),4,11(13)-trien-12-al | [73]   |
| 126* | 16.68 | C <sub>18</sub> H <sub>36</sub> O <sub>4</sub>                | 316.2614 | 316.2628 | 4.43  | 315.2545[M–H] <sup>–</sup> , 297.2453[M–H–H <sub>2</sub> O] <sup>–</sup> , 171.1031[M–H–C <sub>9</sub> H <sub>18</sub> –H <sub>2</sub> O] <sup>–</sup> , 141.1291[M–H–C <sub>9</sub> H <sub>16</sub> O <sub>2</sub> –H <sub>2</sub> O] <sup>–</sup>                                        | 9,10-Dihydroxystearic acid          | CFM-ID |
| 127* | 16.72 | C <sub>16</sub> H <sub>30</sub> O <sub>3</sub>                | 270.2195 | 270.222  | 2.59  | 293.2116[M+Na] <sup>+</sup> , 269.2124[M+H] <sup>+</sup> , 165.1651[M+H–C <sub>4</sub> H <sub>8</sub> O <sub>3</sub> ] <sup>+</sup> , 121.1025[M+H–C <sub>7</sub> H <sub>16</sub> O <sub>3</sub> ] <sup>+</sup> , 95.0869[M+H–C <sub>9</sub> H <sub>18</sub> O <sub>3</sub> ] <sup>+</sup> | (6Z)-2-Hydroxy-6-hexadecenoic acid  | CFM-ID |
| 128* | 16.78 | C <sub>18</sub> H <sub>30</sub> O <sub>3</sub>                | 294.2195 | 294.2207 | 4.08  | 293.2134[M–H] <sup>–</sup> , 275.2035[M–H–H <sub>2</sub> O] <sup>–</sup> , 249.2230[M–H–HCOOH] <sup>–</sup> , 195.1401[M–H–C <sub>6</sub> H <sub>10</sub> O] <sup>–</sup>                                                                                                                  | 13-oxo-9,11-Octadecadienoic acid    | CFM-ID |
| 129* | 17.64 | C <sub>26</sub> H <sub>50</sub> NO <sub>7</sub><br>P          | 519.3325 | 519.3336 | 2.12  | 520.3408[M+H] <sup>+</sup> , 184.0744[M+H–C <sub>21</sub> H <sub>38</sub> O <sub>3</sub> ] <sup>+</sup> , 104.1101[M+H–C <sub>21</sub> H <sub>37</sub> O <sub>6</sub> P] <sup>+</sup> , 86.1006[M+H–C <sub>21</sub> H <sub>39</sub> O <sub>7</sub> P] <sup>+</sup>                         | LPC (18:2)                          | CFM-ID |
| 130* | 17.92 | C <sub>18</sub> H <sub>32</sub> O <sub>3</sub>                | 296.2351 | 296.2361 | 3.38  | 295.2288[M–H] <sup>–</sup> , 277.2180[M–H <sub>2</sub> O] <sup>–</sup> , 250.2309[M–HCOOH] <sup>–</sup>                                                                                                                                                                                    | Coronaric acid                      | CFM-ID |
| 131* | 18.46 | C <sub>18</sub> H <sub>30</sub> O <sub>3</sub>                | 294.2195 | 294.2203 | 2.72  | 293.2131[M–H] <sup>–</sup> , 275.2042[M–H–H <sub>2</sub> O] <sup>–</sup> , 249.2230[M–H–HCOOH] <sup>–</sup> , 113.0973[M–H–C <sub>11</sub> H <sub>16</sub> O <sub>2</sub> ] <sup>–</sup>                                                                                                   | 9-Oxo-10,12-Octadecadienoic acid    | S      |
| 132* | 18.65 | C <sub>24</sub> H <sub>50</sub> NO <sub>7</sub><br>P          | 495.3325 | 495.3337 | 2.42  | 496.3409[M+H] <sup>+</sup> , 184.0742[M+H–C <sub>19</sub> H <sub>36</sub> O <sub>3</sub> ] <sup>+</sup> , 104.1100[M+H–C <sub>19</sub> H <sub>37</sub> O <sub>6</sub> P] <sup>+</sup> , 86.1006[M+H–C <sub>19</sub> H <sub>39</sub> O <sub>7</sub> P] <sup>+</sup>                         | LPC (16:0)                          | S      |
| 133* | 19.26 | C <sub>26</sub> H <sub>52</sub> NO <sub>7</sub><br>P          | 521.3481 | 521.3486 | 0.96  | 522.3559[M+H] <sup>+</sup> , 184.0745[M+H–C <sub>21</sub> H <sub>38</sub> O <sub>3</sub> ] <sup>+</sup> , 104.1101[M+H–C <sub>21</sub> H <sub>39</sub> O <sub>6</sub> P] <sup>+</sup> , 86.1005[M+H–C <sub>21</sub> H <sub>41</sub> O <sub>7</sub> P] <sup>+</sup>                         | LPC (18:1)                          | S      |
| 134* | 19.30 | C <sub>16</sub> H <sub>22</sub> O <sub>4</sub>                | 278.1518 | 278.1526 | 2.88  | 301.1419[M+Na] <sup>+</sup> , 279.1571[M+H] <sup>+</sup> , 149.0245[M+H–C <sub>4</sub> H <sub>8</sub> –C <sub>4</sub> H <sub>9</sub> O] <sup>+</sup> , 121.0305[M+H–C <sub>4</sub> H <sub>9</sub> –C <sub>3</sub> H <sub>9</sub> O <sub>2</sub> ] <sup>+</sup>                             | Dibutyl phthalate                   | [74]   |
| 135* | 19.38 | C <sub>18</sub> H <sub>34</sub> O <sub>3</sub>                | 298.2508 | 298.2519 | 3.69  | 297.2446[M–H] <sup>–</sup> , 279.2335[M–H–H <sub>2</sub> O] <sup>–</sup> , 253.2542[M–H–HCOOH] <sup>–</sup>                                                                                                                                                                                | Ricinoleic acid                     | CFM-ID |
| 136* | 21.00 | C <sub>30</sub> H <sub>48</sub> O <sub>4</sub>                | 472.3553 | 472.3575 | 4.66  | 471.3492[M–H] <sup>–</sup> , 427.3588[M–H–HCOOH] <sup>–</sup> , 411.3273[M–H–HCOOH–CH <sub>3</sub> ] <sup>–</sup>                                                                                                                                                                          | Macrocarpoic acid A                 | [75]   |
| 137* | 22.39 | C <sub>18</sub> H <sub>30</sub> O <sub>2</sub>                | 278.2246 | 278.2259 | 4.67  | 277.2176[M–H] <sup>–</sup> , 259.2076[M–H–H <sub>2</sub> O] <sup>–</sup> , 109.0661[M–H–C <sub>11</sub> H <sub>18</sub> –H <sub>2</sub> O] <sup>–</sup>                                                                                                                                    | Linolenic acid                      | S      |
| 138* | 22.58 | C <sub>16</sub> H <sub>32</sub> O <sub>3</sub>                | 272.2351 | 272.2386 | 2.21  | 271.2314[M–H] <sup>–</sup> , 225.2255[M–H–HCOOH] <sup>–</sup> , 223.2086[M–H–2H <sub>2</sub> O–CH <sub>3</sub> ] <sup>–</sup> , 197.1904[M–H–2H <sub>2</sub> O–C <sub>3</sub> H <sub>7</sub> ] <sup>–</sup>                                                                                | 3-Hydroxyhexadecanoic acid          | CFM-ID |
| 139* | 23.98 | C <sub>30</sub> H <sub>48</sub> O                             | 424.3705 | 424.3700 | -1.18 | 425.3773[M+H] <sup>+</sup> , 205.1942[M+H–C <sub>15</sub> H <sub>24</sub> O] <sup>+</sup> , 189.1644[M+H–C <sub>16</sub> H <sub>28</sub> O] <sup>+</sup> , 161.1335[M+H–C <sub>18</sub> H <sub>32</sub> O] <sup>+</sup>                                                                    | Lupenone                            | [76]   |
| 140* | 24.04 | C <sub>18</sub> H <sub>32</sub> O <sub>2</sub>                | 280.2402 | 280.2412 | 3.57  | 279.2329[M–H] <sup>–</sup> , 261.2229[M–H–H <sub>2</sub> O] <sup>–</sup>                                                                                                                                                                                                                   | Linoleic acid                       | S      |
| 141* | 24.25 | C <sub>30</sub> H <sub>48</sub> O                             | 424.3705 | 424.3695 | -2.36 | 425.3767[M+H] <sup>+</sup> , 409.3454[M+H–CH <sub>3</sub> ] <sup>+</sup> , 217.1953[M+H–C <sub>14</sub> H <sub>24</sub> O] <sup>+</sup> , 137.1337[M+H–C <sub>20</sub> H <sub>32</sub> O] <sup>+</sup>                                                                                     | Amyrone                             | [77]   |
| 142* | 24.62 | C <sub>30</sub> H <sub>48</sub> O <sub>2</sub>                | 440.3654 | 440.3651 | -0.68 | 441.3724[M+H] <sup>+</sup> , 231.2112[M+H–C <sub>13</sub> H <sub>21</sub> O] <sup>+</sup> , 187.1493[M+H–C <sub>16</sub> H <sub>28</sub> O–H <sub>2</sub> O] <sup>+</sup>                                                                                                                  | Ptiliopoxide                        | [78]   |
| 143* | 24.63 | C <sub>30</sub> H <sub>48</sub> O                             | 424.3705 | 424.3693 | -2.83 | 425.3765[M+H] <sup>+</sup> , 205.1954[M+H–C <sub>15</sub> H <sub>24</sub> O] <sup>+</sup> , 189.1640[M+H–C <sub>16</sub> H <sub>28</sub> O] <sup>+</sup>                                                                                                                                   | Taraxasterone                       | [79]   |
| 144* | 24.82 | C <sub>30</sub> H <sub>48</sub> O <sub>2</sub>                | 440.3654 | 440.3658 | 0.91  | 441.3731[M+H] <sup>+</sup> , 423.3611[M+H–H <sub>2</sub> O] <sup>+</sup> , 191.1803[M+H–C <sub>16</sub> H <sub>26</sub> O <sub>2</sub> ] <sup>+</sup> , 123.1191[M+H–C <sub>21</sub> H <sub>34</sub> O <sub>2</sub> ] <sup>+</sup>                                                         | 11 $\alpha$ -Hydroxyurs-12-en-3-one | [80]   |
| 145* | 24.87 | C <sub>35</sub> H <sub>36</sub> N <sub>4</sub> O <sub>5</sub> | 592.2686 | 592.2696 | 1.69  | 593.2769[M+H] <sup>+</sup> , 533.2556[M+H–C <sub>2</sub> H <sub>4</sub> O <sub>2</sub> ] <sup>+</sup>                                                                                                                                                                                      | Pheophorbide A                      | [81]   |
| 146* | 25.44 | C <sub>30</sub> H <sub>48</sub> O <sub>2</sub>                | 440.3654 | 440.3644 | -2.27 | 441.3717[M+H] <sup>+</sup> , 189.1638[M+H–C <sub>16</sub> H <sub>28</sub> O <sub>2</sub> ] <sup>+</sup> , 135.1184[M+H–C <sub>20</sub> H <sub>34</sub> O <sub>2</sub> ] <sup>+</sup>                                                                                                       | 11-Oxo-amyrin                       | [82]   |
| 147* | 25.60 | C <sub>16</sub> H <sub>32</sub> O <sub>2</sub>                | 256.2402 | 256.2409 | 2.73  | 255.2326[M–H] <sup>–</sup> , 237.2208[M–H–H <sub>2</sub> O] <sup>–</sup>                                                                                                                                                                                                                   | Hexadecanoic acid                   | CFM-ID |
| 148* | 27.87 | C <sub>28</sub> H <sub>48</sub> O <sub>2</sub>                | 416.3654 | 416.3669 | 3.60  | 461.3661[M+HCOO] <sup>–</sup> , 415.3591[M–H] <sup>–</sup>                                                                                                                                                                                                                                 | $\beta$ -Tocopherol                 | CFM-ID |

|      |       |                                                |          |          |      |                                                                                                                                                           |                   |      |
|------|-------|------------------------------------------------|----------|----------|------|-----------------------------------------------------------------------------------------------------------------------------------------------------------|-------------------|------|
|      |       |                                                |          |          |      | 281.2849[M-H-C <sub>9</sub> H <sub>10</sub> O] <sup>-</sup>                                                                                               |                   |      |
| 149* | 28.02 | C <sub>24</sub> H <sub>38</sub> O <sub>4</sub> | 390.2770 | 390.2770 | 0.00 | 413.2662[M+Na] <sup>+</sup> , 391.2847[M+H] <sup>+</sup> ,<br>149.0247[M+H-C <sub>8</sub> H <sub>17</sub> -C <sub>8</sub> H <sub>17</sub> O] <sup>+</sup> | Diethyl phthalate | [83] |

S: compared with the reference compounds.

CFM-ID: compared with the CFM-ID 4.0 [84].

\* identified from SP for the first time

**Table S2.** Precision and accuracy of 20 investigated analytes by UPLC-Q/TOF-MS

| No. | Compound                  | Precision (RSD, %) |              | Accuracy (n=5) |         |
|-----|---------------------------|--------------------|--------------|----------------|---------|
|     |                           | intra- (n=5)       | inter- (n=6) | Mean           | RSD (%) |
| 2   | Chlorogenic acid          | 2.49               | 1.34         | 98.8           | 0.90    |
| 13  | Neochlorogenic acid       | 2.42               | 2.34         | 101.5          | 2.43    |
| 60  | Luteolin 7-glucuronide    | 2.60               | 2.44         | 99.9           | 2.68    |
| 61  | Rutin                     | 2.57               | 2.77         | 101.5          | 2.29    |
| 62  | Isoquercitroside          | 2.70               | 2.84         | 96.8           | 2.28    |
| 66  | 1,4-Dicaffeoylquinic acid | 1.74               | 1.41         | 100.4          | 0.99    |
| 68  | 1,5-Dicaffeoylquinic acid | 2.38               | 2.99         | 98.2           | 2.79    |
| 69  | Narcisin                  | 1.94               | 2.55         | 99.0           | 0.94    |
| 72  | Syringaresinol            | 2.35               | 1.32         | 96.4           | 2.52    |
| 73  | Quercitrin                | 1.48               | 1.95         | 100.4          | 2.67    |
| 76  | 4,5-Dicaffeoylquinic acid | 1.96               | 2.49         | 101.0          | 1.87    |
| 78  | Pinoresinol 4- glucoside  | 1.85               | 2.12         | 99.7           | 2.34    |
| 85  | Matairesinoside           | 2.42               | 2.91         | 98.9           | 2.08    |
| 93  | Pinoresinol               | 1.32               | 2.89         | 98.8           | 1.70    |
| 96  | Arctiin                   | 2.10               | 2.90         | 97.9           | 1.82    |
| 97  | Luteolin                  | 2.78               | 1.83         | 98.5           | 1.52    |
| 102 | Eupafolin                 | 2.85               | 1.84         | 96.4           | 2.01    |
| 106 | Apigenin                  | 2.12               | 2.59         | 100.8          | 1.04    |
| 108 | Matairesinol              | 1.91               | 2.31         | 98.7           | 2.44    |
| 116 | Arctigenin                | 2.49               | 2.10         | 98.2           | 1.97    |

**Table S3.** The RSDs (%) of peak area and RT in validation tests

| Tests            | ESI- mode |           | ESI+ mode |           |
|------------------|-----------|-----------|-----------|-----------|
|                  | Peak area | RT        | Peak area | RT        |
| System stability | 1.20~2.92 | 0.25~2.31 | 1.13~2.17 | 0.18~2.56 |
| Precision        | 0.47~2.65 | 0.10~2.20 | 1.01~2.75 | 0.26~2.04 |
| Reproducibility  | 1.68~2.92 | 0.12~2.84 | 1.01~2.75 | 0.13~2.38 |
| Sample stability | 0.95~2.55 | 0.28~2.36 | 0.91~2.66 | 0.52~2.08 |

**Figure S1.** The representative BPI chromatograms of serum and colon samples of control, model and SPH groups in negative modes (A-F) and in positive modes (G-L).

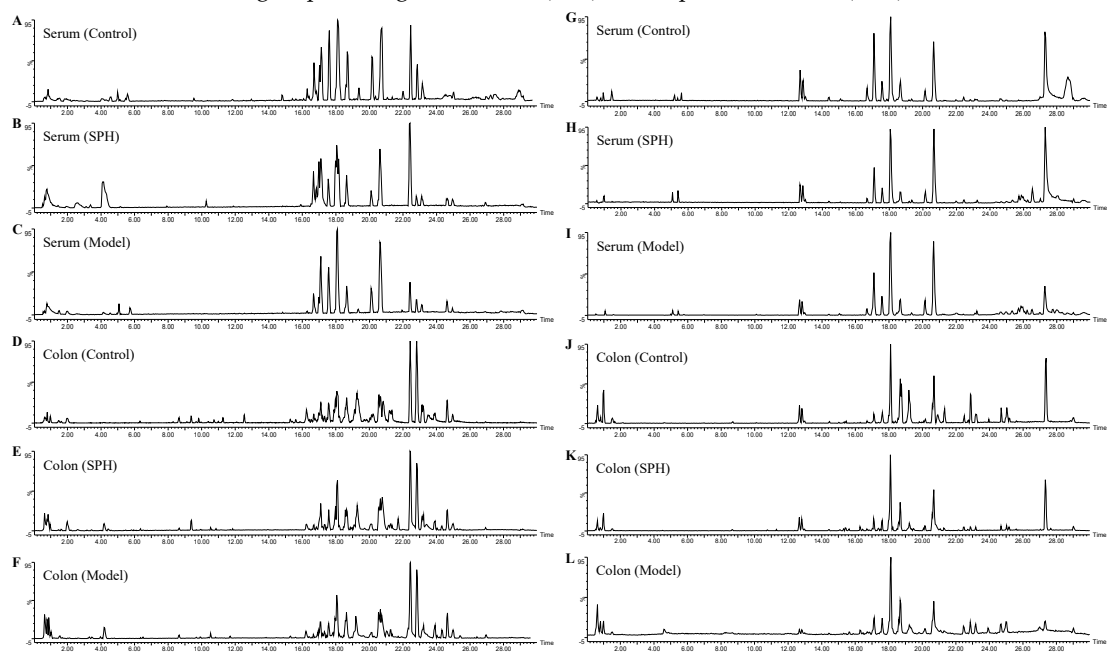

**Table S4.** The AUCs and p values of the biomarkers in different ROC curves

| HMDB No.    | Control & Model |          | SPH & Model |          |
|-------------|-----------------|----------|-------------|----------|
|             | AUC             | <i>p</i> | AUC         | <i>p</i> |
| HMDB0000094 | 1.000           | <0.001   | 1.000       | <0.001   |
| HMDB0000134 | 1.000           | <0.001   | 1.000       | <0.001   |
| HMDB0000158 | 0.990           | <0.001   | 0.910       | 0.01     |
| HMDB0000159 | 0.920           | <0.001   | 0.900       | 0.001    |
| HMDB0000191 | 1.000           | <0.001   | 1.000       | <0.001   |
| HMDB0000251 | 1.000           | <0.001   | 1.000       | <0.001   |
| HMDB0000252 | 0.980           | 0.01     | 0.855       | 0.01     |
| HMDB0000254 | 1.000           | <0.001   | 1.000       | 0.01     |
| HMDB0000269 | 1.000           | <0.001   | 0.990       | 0.01     |
| HMDB0000673 | 1.000           | <0.001   | 1.000       | 0.01     |
| HMDB0001043 | 1.000           | <0.001   | 1.000       | <0.001   |
| HMDB0001085 | 1.000           | <0.001   | 0.990       | 0.01     |
| HMDB0001139 | 0.990           | <0.001   | 0.900       | 0.01     |
| HMDB0001193 | 1.000           | <0.001   | 0.930       | <0.001   |
| HMDB0001381 | 1.000           | <0.001   | 1.000       | 0.001    |
| HMDB0001388 | 1.000           | <0.001   | 1.000       | <0.001   |
| HMDB0001852 | 0.910           | <0.001   | 0.900       | 0.01     |
| HMDB0002232 | 1.000           | <0.001   | 1.000       | <0.001   |
| HMDB0004610 | 1.000           | <0.001   | 1.000       | <0.001   |
| HMDB0007883 | 1.000           | <0.001   | 0.960       | <0.001   |
| HMDB0008204 | 1.000           | <0.001   | 1.000       | <0.001   |



## References:

1. Smyrska-Wieleba, N.; Wojtanowski, K.K.; Mroczek, T. Comparative HILIC/ESI-QTOF-MS and HPTLC studies of pyrrolizidine alkaloids in flowers of *Tussilago farfara* and roots of *Arnebia euchroma*. *Phytochemistry Letters* **2017**, *20*, 339-349.
2. Yamauchi, Y.; Ge, Y.-W.; Yoshimatsu, K.; Komatsu, K.; Kuboyama, T.; Yang, X.; Tohda, C. Memory Enhancement by Oral Administration of Extract of *Eleutherococcus senticosus* Leaves and Active Compounds Transferred in the Brain. *Nutrients* **2019**, *11*, 1142.
3. Korul'kina, L.; Shul'ts, E.; Zhusupova, G.; Abilov, Z.A.; Erzhanov, K.; Chaudri, M. Biologically active compounds from *Limonium gmelinii* and *L. popovii* l. *Chem. Nat. Compd.* **2004**, *40*, 465-471.
4. Yang, Z.-Y.; Lu, D.-Y.; Yao, S.; Zhang, R.-R.; Jiang, Z.-J.; Ma, Z.-G. Chemical fingerprint and quantitative analysis of *Cistanchedeserticola* by HPLC-DAD-ESI-MS. *J. Food Drug Anal.* **2013**, *21*, 50-57.
5. Zhang, K.; Liu, W.; Song, Q.; Wan, J.-B.; Yu, J.; Gong, X.; Cao, L.; Si, D.; Tu, P.; Li, J. Integrated Strategy Drives Direct Infusion-Tandem Mass Spectrometry as an Eligible Tool for Shotgun Pseudo-Targeted Metabolomics of Medicinal Plants. *Anal. Chem.* **2021**, *93*, 2541-2550.
6. He, J.; Dong, Y.; Liu, X.; Wan, Y.; Gu, T.; Zhou, X.; Liu, M. Comparison of chemical compositions, antioxidant, and anti-photoaging activities of *Paeonia suffruticosa* flowers at different flowering stages. *Antioxidants* **2019**, *8*, 345.
7. Kumar, S.; Chandra, P.; Bajpai, V.; Singh, A.; Srivastava, M.; Mishra, D.; Kumar, B. Rapid qualitative and quantitative analysis of bioactive compounds from *Phyllanthus amarus* using LC/MS/MS techniques. *Industrial Crops and Products* **2015**, *69*, 143-152.
8. Llorach, R.; Favari, C.; Alonso, D.; Garcia-Aloy, M.; Andres-Lacueva, C.; Urpi-Sarda, M. Comparative metabolite fingerprinting of legumes using LC-MS-based untargeted metabolomics. *Food Res. Int.* **2019**, *126*, 108666.
9. Hau, J.; Devaud, S.; Blank, I. Detection of *Amadori* compounds by capillary electrophoresis coupled to tandem mass spectrometry. *Electrophoresis* **2004**, *25*, 2077-2083.
10. Otsuka, H.; Takeuchi, M.; Inoshiri, S.; Sato, T.; Yamasaki, K. Phenolic compounds from *Coix lachryma-jobi* var. *ma-yuen*. *Phytochemistry* **1989**, *28*, 883-886.
11. Lin, L.-Z.; Sun, J.; Chen, P.; Harnly, J. UHPLC-PDA-ESI/HRMS/MS n analysis of anthocyanins, flavonol glycosides, and hydroxycinnamic acid derivatives in red mustard greens (*Brassica juncea* Coss variety). *J. Agric. Food Chem.* **2011**, *59*, 12059-12072.
12. Yang, Y.-L.; Al-Mahdy, D.A.; Wu, M.-L.; Zheng, X.-T.; Piao, X.-H.; Chen, A.-L.; Wang, S.-M.; Yang, Q.; Ge, Y.-W. LC-MS-based identification and antioxidant evaluation of small molecules from the cinnamon oil extraction waste. *Food Chem.* **2022**, *366*, 130576.
13. Bartsch, M.; Bednarek, P.; Vivancos, P.D.; Schneider, B.; von Roepenack-Lahaye, E.; Foyer, C.H.; Kombrink, E.; Scheel, D.; Parker, J.E. Accumulation of isochorismate-derived 2, 3-dihydroxybenzoic 3-O- $\beta$ -D-xyloside in *Arabidopsis* resistance to pathogens and ageing of leaves. *J. Biol. Chem.* **2010**, *285*, 25654-25665.
14. Mujahid, M.; Sasikala, C.; Ramana, C.V. Aniline-induced tryptophan production and identification of indole derivatives from three purple bacteria. *Curr. Microbiol.* **2010**, *61*, 285-290.
15. Shakya, R.; Navarre, D.A. Rapid screening of ascorbic acid, glycoalkaloids, and phenolics in potato using high-performance liquid chromatography. *J. Agric. Food Chem.* **2006**, *54*, 5253-5260.

16. Liu, L.; Cui, Z.-x.; Zhang, Y.-b.; Xu, W.; Yang, X.-w.; Zhong, L.-j.; Zhang, P.; Gong, Y. Identification and quantification analysis of the chemical constituents from Mahonia fortune using Q-Exactive HF Mass Spectrometer and UPLC-ESI-MS/MS. *J. Pharm. Biomed. Anal.* **2021**, *196*, 113903.
17. Antunes, A.C.; Acunha, T.d.S.; Perin, E.C.; Rombaldi, C.V.; Galli, V.; Chaves, F.C. Untargeted metabolomics of strawberry (*Fragaria x ananassa* 'Camarosa') fruit from plants grown under osmotic stress conditions. *J. Sci. Food Agric.* **2019**, *99*, 6973-6980.
18. Yang, M.C.; Choi, S.U.; Choi, W.S.; Kim, S.Y.; Lee, K.R. Guaiane sesquiterpene lactones and amino acid-sesquiterpene lactone conjugates from the aerial parts of *Saussurea pulchella*. *J. Nat. Prod.* **2008**, *71*, 678-683.
19. Kammerer, B.; Kahlich, R.; Biegert, C.; Gleiter, C.H.; Heide, L. HPLC-MS/MS analysis of willow bark extracts contained in pharmaceutical preparations. *Phytochemical Analysis: An International Journal of Plant Chemical and Biochemical Techniques* **2005**, *16*, 470-478.
20. Milutinović, V.; Niketić, M.; Krunić, A.; Nikolić, D.; Petković, M.; Ušjak, L.; Petrović, S. Sesquiterpene lactones from the methanol extracts of twenty-eight Hieracium species from the Balkan Peninsula and their chemosystematic significance. *Phytochemistry* **2018**, *154*, 19-30.
21. Duan, H.; Takaishi, Y.; Momota, H.; Ohmoto, Y.; Taki, T. Immunosuppressive constituents from *Saussurea medusa*. *Phytochemistry* **2002**, *59*, 85-90.
22. Xu, S.j.; Yang, L.; Zeng, X.; Zhang, M.; Wang, Z.t. Characterization of compounds in the Chinese herbal drug Mu-Dan-Pi by liquid chromatography coupled to electrospray ionization mass spectrometry. *Rapid Communications in Mass Spectrometry: An International Journal Devoted to the Rapid Dissemination of Up-to-the-Minute Research in Mass Spectrometry* **2006**, *20*, 3275-3288.
23. Saravanakumar, K.; Park, S.; Sathiyaseelan, A.; Kim, K.-N.; Cho, S.-H.; Mariadoss, A.V.A.; Wang, M.-H. Metabolite profiling of methanolic extract of *Gardenia jaminoides* by LC-MS/MS and GC-MS and its anti-diabetic, and anti-oxidant activities. *Pharmaceuticals* **2021**, *14*, 102.
24. Anttonen, M.J.; Karjalainen, R.O. High-performance liquid chromatography analysis of black currant (*Ribes nigrum* L.) fruit phenolics grown either conventionally or organically. *J. Agric. Food Chem.* **2006**, *54*, 7530-7538.
25. Fang, N.; Yu, S.; Prior, R.L. LC/MS/MS characterization of phenolic constituents in dried plums. *J. Agric. Food Chem.* **2002**, *50*, 3579-3585.
26. Owen, R.; Haubner, R.; Hull, W.; Erben, G.; Spiegelhalder, B.; Bartsch, H.; Haber, B. Isolation and structure elucidation of the major individual polyphenols in carob fibre. *Food Chem. Toxicol.* **2003**, *41*, 1727-1738.
27. Tolonen, A.; Hohtola, A.; Jalonen, J. Comparison of electrospray ionization and atmospheric pressure chemical ionization techniques in the analysis of the main constituents from *Rhodiola rosea* extracts by liquid chromatography/mass spectrometry. *J. Mass Spectrom.* **2003**, *38*, 845-853.
28. Hu, H.; Yau, L.-F.; Peng, J.; Hu, B.; Li, J.; Li, Y.; Huang, H. Comparative Research of Chemical Profiling in Different Parts of *Fissistigma oldhamii* by Ultra-High-Performance Liquid Chromatography Coupled with Hybrid Quadrupole-Orbitrap Mass Spectrometry. *Molecules* **2021**, *26*, 960.

29. Duan, L.; Xiong, H.; Du, Y.; Wang, Z.; Li, Y.; Zhao, S.; Chen, J.; Si, D.; Pan, H. High-throughput LC–MS method for the rapid characterisation and comparative analysis of multiple ingredients of four hawthorn leaf extracts. *Phytochem. Anal.* **2022**.
30. Fan, C.-Q.; Yue, J.-M. Biologically active phenols from *Saussurea medusa*. *Biorg. Med. Chem.* **2003**, *11*, 703–708.
31. Jaiswal, R.; Kuhnert, N. How to identify and discriminate between the methyl quinates of chlorogenic acids by liquid chromatography–tandem mass spectrometry. *J. Mass Spectrom.* **2011**, *46*, 269–281.
32. Xie, H.; Wang, T.; Matsuda, H.; Morikawa, T.; Yoshikawa, M.; Tani, T. Bioactive constituents from Chinese natural medicines. XV. Inhibitory effect on aldose reductase and structures of saussureosides A and B from *Saussurea medusa*. *Chem. Pharm. Bull.* **2005**, *53*, 1416–1422.
33. Knust, U.; Erben, G.; Spiegelhalder, B.; Bartsch, H.; Owen, R.W. Identification and quantitation of phenolic compounds in faecal matrix by capillary gas chromatography and nano-electrospray mass spectrometry. *Rapid Communications in Mass Spectrometry: An International Journal Devoted to the Rapid Dissemination of Up-to-the-Minute Research in Mass Spectrometry* **2006**, *20*, 3119–3129.
34. Zhou, Z.W.; Yin, S.; Wang, X.N.; Fan, C.Q.; Li, H.; Yue, J.M. Two new lignan glycosides from *Saussurea laniceps*. *Helv. Chim. Acta* **2007**, *90*, 951–956.
35. Mellegård, H.; Stalheim, T.; Hormazabal, V.; Granum, P.; Hardy, S. Antibacterial activity of sphagnum acid and other phenolic compounds found in *Sphagnum papillosum* against food-borne bacteria. *Lett. Appl. Microbiol.* **2009**, *49*, 85–90.
36. Wu, D.; Wang, H.; Tan, J.; Wang, C.; Lin, H.; Zhu, H.; Liu, J.; Li, P.; Yin, J. Pharmacokinetic and metabolism studies of curculigoside C by UPLC-MS/MS and UPLC-QTOF-MS. *Molecules* **2018**, *24*, 21.
37. Yang, D.S.; Whang, W.K.; Kim, I.H. The constituents of *Taraxacum hallaisanensis* roots. *Arch. Pharmacol. Res.* **1996**, *19*, 507–513.
38. Rodríguez-Pérez, C.; Quirantes-Piné, R.; Fernández-Gutiérrez, A.; Segura-Carretero, A. Comparative characterization of phenolic and other polar compounds in Spanish melon cultivars by using high-performance liquid chromatography coupled to electrospray ionization quadrupole-time of flight mass spectrometry. *Food Res. Int.* **2013**, *54*, 1519–1527.
39. LIANG, Y.-H. Lignans and flavonoids from rhizome of *Drynaria fortunei*. *Chinese Traditional and Herbal Drugs* **2011**, 25–30.
40. Michalska, A.; Wojdyło, A.; Bogucka, B. The influence of nitrogen and potassium fertilisation on the content of polyphenolic compounds and antioxidant capacity of coloured potato. *J. Food Compost. Anal.* **2016**, *47*, 69–75.
41. Cao, Y.; Gu, C.; Zhao, F.; Tang, Y.; Cui, X.; Shi, L.; Xu, L.; Yin, L. Therapeutic effects of *Cyathula officinalis* Kuan and its active fraction on acute blood stasis rat model and identification constituents by HPLC-QTOF/MS/MS. *Pharmacogn. Mag.* **2017**, *13*, 693.
42. Ha, T.J.; Jang, D.S.; Lee, J.R.; Lee, K.D.; Lee, J.; Hwang, S.W.; Jung, H.J.; Nam, S.H.; Park, K.H.; Yang, M.S. Cytotoxic effects of sesquiterpene lactones from the flowers of *Hemisteptia lyrata* B. *Arch. Pharmacol. Res.* **2003**, *26*, 925–928.
43. Kuo, Y.-H.; Way, S.-T.; Wu, C.-H. A new triterpene and a new lignan from *Saussurea japonica*. *J. Nat. Prod.* **1996**, *59*, 622–624.

44. Yang, N.; Wang, H.; Lin, H.; Liu, J.; Zhou, B.; Chen, X.; Wang, C.; Liu, J.; Li, P. Comprehensive metabolomics analysis based on UPLC-Q/TOF-MS E and the anti-COPD effect of different parts of *Celastrus orbiculatus* Thunb. *RSC Advances* **2020**, *10*, 8396-8420.
45. Han, Y.; Zhou, M.; Wang, L.; Ying, X.; Peng, J.; Jiang, M.; Bai, G.; Luo, G. Comparative evaluation of different cultivars of *Flos Chrysanthemi* by an anti-inflammatory-based NF- $\kappa$ B reporter gene assay coupled to UPLC-Q/TOF MS with PCA and ANN. *J. Ethnopharmacol.* **2015**, *174*, 387-395.
46. Gattuso, G.; Caristi, C.; Gargiulli, C.; Bellocco, E.; Toscano, G.; Leuzzi, U. Flavonoid glycosides in bergamot juice (*Citrus bergamia* Risso). *J. Agric. Food Chem.* **2006**, *54*, 3929-3935.
47. Ye, M.; Han, J.; Chen, H.; Zheng, J.; Guo, D. Analysis of phenolic compounds in rhubarbs using liquid chromatography coupled with electrospray ionization mass spectrometry. *J. Am. Soc. Mass Spectrom.* **2007**, *18*, 82-91.
48. Wei, L.; Mei, Y.; Zou, L.; Chen, J.; Tan, M.; Wang, C.; Cai, Z.; Lin, L.; Chai, C.; Yin, S. Distribution patterns for bioactive constituents in pericarp, stalk and seed of *Forsythiae fructus*. *Molecules* **2020**, *25*, 340.
49. Dai, X.; Zhuang, J.; Wu, Y.; Wang, P.; Zhao, G.; Liu, Y.; Jiang, X.; Gao, L.; Xia, T. Identification of a flavonoid glucosyltransferase involved in 7-OH site glycosylation in tea plants (*Camellia sinensis*). *Sci. Rep.* **2017**, *7*, 1-14.
50. Flores, R.M.; Doskey, P.V. Evaluation of multistep derivatization methods for identification and quantification of oxygenated species in organic aerosol. *J. Chromatogr.* **2015**, *1418*, 1-11.
51. Fu, S.; Arráez-Roman, D.; Segura-Carretero, A.; Menéndez, J.A.; Menéndez-Gutiérrez, M.P.; Micol, V.; Fernández-Gutiérrez, A. Qualitative screening of phenolic compounds in olive leaf extracts by hyphenated liquid chromatography and preliminary evaluation of cytotoxic activity against human breast cancer cells. *Anal. Bioanal. Chem.* **2010**, *397*, 643-654.
52. Lin, L.-Z.; Harnly, J.M. Identification of hydroxycinnamoylquinic acids of arnica flowers and burdock roots using a standardized LC-DAD-ESI/MS profiling method. *J. Agric. Food Chem.* **2008**, *56*, 10105-10114.
53. Singh, P.; Bhala, M. Guaianolides from *Saussurea candicans*. *Phytochemistry* **1988**, *27*, 1203-1205.
54. Fan, C.-Q.; Zhu, X.-Z.; Zhan, Z.-J.; Ji, X.-Q.; Li, H.; Yue, J.-M. Lignans from *Saussurea conica* and their NO production suppressing activity. *Planta Med.* **2006**, *72*, 590-595.
55. Wang, X.R.; Wu, Q.X.; Shi, Y.P. Terpenoids and sterols from *Saussurea cauloptera*. *Chem. Biodivers.* **2008**, *5*, 279-289.
56. Zhang, Y.-B.; Yang, X.-B.; Yang, X.-W.; Xu, W.; Li, F.; Gonzezal, F.J. Liquid chromatography with tandem mass spectrometry: A sensitive method for the determination of dehydrodiisoeugenol in rat cerebral nuclei. *Molecules* **2016**, *21*, 321.
57. Ichihara, A.; Numata, Y.; Kanai, S.; Sakamura, S. New sesquilignans from *Arctium lappa* L. The structure of lappaol C, D and E. *Agric. Biol. Chem.* **1977**, *41*, 1813-1814.
58. Joo, J.; Lee, D.; Wu, Z.; Shin, J.H.; Lee, H.S.; Kwon, B.M.; Huh, T.L.; Kim, Y.W.; Lee, S.J.; Kim, T.W. In vitro metabolism of obovatol and its effect on cytochrome P450 enzyme activities in human liver microsomes. *Biopharm. Drug Disposition* **2013**, *34*, 195-202.
59. Freund, D.M.; Martin, A.C.; Cohen, J.D.; Hegeman, A.D. Direct detection of surface localized specialized metabolites from *Glycyrrhiza lepidota* (American licorice) by leaf spray mass spectrometry. *Planta* **2018**, *247*, 267-275.

60. Aabideen, Z.U.; Mumtaz, M.W.; Akhtar, M.T.; Mukhtar, H.; Raza, S.A.; Touqeer, T.; Saari, N. Anti-obesity attributes; UHPLC-QTOF-MS/MS-based metabolite profiling and molecular docking insights of *Taraxacum officinale*. *Molecules* **2020**, *25*, 4935.
61. Bohlmann, F.; Singh, P.; Jakupovic, J.; Huneck, S. Further guaianolides from *Saussurea* species. *Planta Med.* **1985**, *51*, 74-75.
62. Ratnam, K.J.; Reddy, R.S.; Sekhar, N.; Kantam, M.L.; Figueras, F. Sulphated zirconia catalyzed acylation of phenols, alcohols and amines under solvent free conditions. *J. Mol. Catal. A: Chem.* **2007**, *276*, 230-234.
63. Zheleva-Dimitrova, D.; Gevrenova, R.; Zaharieva, M.M.; Najdenski, H.; Ruseva, S.; Lozanov, V.; Balabanova, V.; Yagi, S.; Momekov, G.; Mitev, V. HPLC-UV and LC-MS analyses of acylquinic acids in *Geigeria alata* (DC) Oliv. & Hiern. and their contribution to antioxidant and antimicrobial capacity. *Phytochem. Anal.* **2017**, *28*, 176-184.
64. Barrero, A.F.; Haidour, A.; Dorado, M.M. Sesquipsapols A and B: two sesquilignans from *Abies pinsapo*. *Nat. Prod. Lett.* **1993**, *2*, 255-262.
65. Fan, C.Q.; Zhan, Z.J.; Li, H.; Yue, J.M. Eudesmane-Type Sesquiterpene Derivatives from *Saussurea conica*. *Helv. Chim. Acta* **2004**, *87*, 1446-1451.
66. Lee, J.H.; Lee, S.J.; Park, S.; Kim, H.K.; Jeong, W.Y.; Choi, J.Y.; Sung, N.-J.; Lee, W.S.; Lim, C.-S.; Kim, G.-S. Characterisation of flavonoids in *Orostachys japonicus* A. Berger using HPLC-MS/MS: Contribution to the overall antioxidant effect. *Food Chem.* **2011**, *124*, 1627-1633.
67. Choi, S.U.; Yang, M.C.; Lee, K.H.; Kim, K.H.; Lee, K.R. Lignan and terpene constituents from the aerial parts of *Saussurea pulchella*. *Arch. Pharmacol. Res.* **2007**, *30*, 1067-1074.
68. Liu, Q.; Majdi, M.; Cankar, K.; Goedbloed, M.; Charnikhova, T.; Verstappen, F.W.; De Vos, R.C.; Beekwilder, J.; Van der Krol, S.; Bouwmeester, H.J. Reconstitution of the costunolide biosynthetic pathway in yeast and *Nicotiana benthamiana*. *PLoS One* **2011**, *6*, e23255.
69. Aboutabl, E.A.; El Mahdy, M.E.; Sokkar, N.M.; Sleem, A.A.; Shams, M.M. Bioactive lignans and other phenolics from the roots, leaves and seeds of *Arctium lappa* L. grown in Egypt. *Egyptian Pharmaceutical Journal* **2012**, *11*, 59.
70. Matsumoto, T.; Hosono-Nishiyama, K.; Yamada, H. Antiproliferative and apoptotic effects of butyrolactone lignans from *Arctium lappa* on leukemic cells. *Planta Med.* **2006**, *72*, 276-278.
71. Nguyen, D.T.; Göpfert, J.C.; Ikezawa, N.; MacNevin, G.; Kathiresan, M.; Conrad, J.; Spring, O.; Ro, D.-K. Biochemical conservation and evolution of germacrene A oxidase in Asteraceae. *J. Biol. Chem.* **2010**, *285*, 16588-16598.
72. Huh, J.; Lee, C.-M.; Lee, S.; Kim, S.; Cho, N.; Cho, Y.-C. Comprehensive Characterization of Lignans from *Forsythia viridissima* by UHPLC-ESI-QTOF-MS, and Their NO Inhibitory Effects on RAW 264.7 Cells. *Molecules* **2019**, *24*, 2649.
73. de Kraker, J.-W.; Franssen, M.C.; de Groot, A.; Shibata, T.; Bouwmeester, H.J. Germacrenes from fresh costus roots. *Phytochemistry* **2001**, *58*, 481-487.
74. Roy, R.N.; Laskar, S.; Sen, S. Dibutyl phthalate, the bioactive compound produced by *Streptomyces albidoflavus* 321.2. *Microbiol. Res.* **2006**, *161*, 121-126.
75. Piacente, S.; Santos, L.C.D.; Mahmood, N.; Pizza, C. Triterpenes from *Maytenus macrocarpa* and evaluation of their anti-HIV activity. *Nat. Prod. Commun.* **2006**, *1*, 1934578X0600101201.

76. Na, M.; Kim, B.Y.; Osada, H.; Ahn, J.S. Inhibition of protein tyrosine phosphatase 1B by lupeol and lupenone isolated from *Sorbus commixta*. *J. Enzyme Inhib. Med. Chem.* **2009**, *24*, 1056-1059.
77. Frankenberger, L.; D. Mora, T.; de Siqueira, C.D.; Filippin-Monteiro, F.B.; de Moraes, M.H.; Biavatti, M.W.; Steindel, M.; Sandjo, L.P. UPLC-ESI-QTOF-MS2 characterisation of *Cola nitida* resin fractions with inhibitory effects on NO and TNF- $\alpha$  released by LPS-activated J774 macrophage and on *Trypanosoma cruzi* and *Leishmania amazonensis*. *Phytochem. Anal.* **2018**, *29*, 577-589.
78. Menichini, F.; Di Benedetto, R.; Delle Monache, F. A triterpene epoxide and a guaianolide from *Ptilostemmon gnaphaloides*. *Phytochemistry* **1996**, *41*, 1377-1379.
79. Pütter, K.M.; van Deenen, N.; Müller, B.; Fuchs, L.; Vorwerk, K.; Unland, K.; Bröker, J.N.; Scherer, E.; Huber, C.; Eisenreich, W. The enzymes OSC1 and CYP716A263 produce a high variety of triterpenoids in the latex of *Taraxacum koksaghyz*. *Sci. Rep.* **2019**, *9*, 1-13.
80. Luis, J.G.; Andrés, L.S. New ursane type triterpenes from *Salvia mellifera* green. *Nat. Prod. Lett.* **1999**, *13*, 187-194.
81. Pop, R.M.; Weesepeel, Y.; Socaciu, C.; Pintea, A.; Vincken, J.-P.; Gruppen, H. Carotenoid composition of berries and leaves from six Romanian sea buckthorn (*Hippophae rhamnoides* L.) varieties. *Food Chem.* **2014**, *147*, 1-9.
82. Rontani, J.-F.; Charrière, B.; Menniti, C.; Aubert, D.; Aubert, C. EIMS Fragmentation and MRM quantification of autoxidation products of  $\alpha$ - and  $\beta$ -amyrins in natural samples. *Rapid Communications in Mass Spectrometry: RCM* **2018**.
83. Takatori, S.; Kitagawa, Y.; Kitagawa, M.; Nakazawa, H.; Hori, S. Determination of di (2-ethylhexyl) phthalate and mono (2-ethylhexyl) phthalate in human serum using liquid chromatography-tandem mass spectrometry. *J. Chromatogr. B* **2004**, *804*, 397-401.
84. Wang, F.; Dana, A.; Tian, S.; Eponine, O.; Vasuk, G.; Russell, G.; Thomaso, M.; Davids, W. CFM-ID 4.0 – a web server for accurate MS-based metabolite identification. *Nucleic Acids Res.* **2022**, W1.
